1 **A versatile genetic toolbox for *Prevotella copri***  
2 **enables studying polysaccharide utilization systems**

3  
4 Jing Li<sup>1</sup>, Eric J.C. Gálvez<sup>1,2\*</sup>, Lena Amend<sup>1\*</sup>, Éva Almasi<sup>1</sup>, Aida Iljazovic<sup>1</sup>, Till R. Lesker<sup>1</sup>, Agata  
5 A. Bielecka<sup>1</sup>, Till Strowig<sup>1,2,3</sup>.

6  
7 1: Department of Microbial Immune Regulation, Helmholtz Centre for Infection Research,  
8 Braunschweig, Germany

9 2: Hannover Medical School, Hannover, Germany

10 3: Centre for Individualized Infection Medicine, Hannover, Germany

11 \*: equally contributed

12  
13 **Lead contact:** [till.strowig@helmholtz-hzi.de](mailto:till.strowig@helmholtz-hzi.de)

14  
15 **Abstract (150 words)**

16 *Prevotella copri* is a prevalent inhabitant of the human gut and has been associated with plant-  
17 rich diet consumption and diverse health states. The underlying genetic basis of these  
18 associations remains enigmatic due to the lack of genetic tools. Here, we developed a novel  
19 versatile genetic toolbox for rapid and efficient genetic insertion and allelic exchange applicable  
20 to *P. copri* strains from multiple clades. Enabled by the genetic platform, we systematically  
21 investigated the specificity of polysaccharide utilization loci (PULs), and identified four highly  
22 conserved PULs for utilizing arabinan, pectic galactan, arabinoxylan and inulin, respectively.  
23 Further genetic and functional analysis of arabinan utilization systems illustrate that *P. copri* has  
24 evolved two distinct types of arabinan-processing PULs (PUL<sup>Ara</sup>) and that the type-II PUL<sup>Ara</sup> is  
25 significantly enriched in individuals consuming a vegan diet compared to other diets. In summary,  
26 this genetic toolbox will enable functional genetic studies for *P. copri* in the future.

27  
28 **Key words:**

29 *Prevotella copri*, genetic manipulation, hybrid two-component system, polysaccharide utilization  
30 locus, human diet

31

## 32 Introduction

33 The complex microbial communities residing in the intestine affect the physiology of the host  
34 influencing the balance between health and disease (Bäckhed et al., 2005; Hooper, 2009). Yet,  
35 extensive interpersonal variability in the human gut microbiota composition and function  
36 complicates the establishment of links between the presence of specific bacterial gene content to  
37 human phenotypes. Functional genetic study of these bacteria is essential to dissect the genetic  
38 basis underlying the microbe-driven host phenotypes. However, many commensal bacterial  
39 species have so far eluded efforts for genetic engineering.

40 For instance, no genetic tools have been established for *Prevotella copri*, a common human gut  
41 microbe, whose prevalence and relative abundance have been linked to various beneficial and  
42 detrimental effects on human health (Claus, 2019; Ley, 2016; Maeda and Takeda, 2019).  
43 Specifically, *P. copri* has been found to be enriched in individuals at risk for rheumatoid arthritis  
44 (Alpizar-Rodriguez et al., 2019; Scher et al., 2013; Wells et al., 2020) and in patients with  
45 enhanced insulin resistance and glucose intolerance (Pedersen et al., 2016). Conversely, others  
46 found *P. copri* to be positively correlated with improved glucose and insulin tolerance during intake  
47 of fiber-rich prebiotic diets (Kovatcheva-Datchary et al., 2015; De Vadder et al., 2016). Besides  
48 the lack of tools for genetic engineering, the establishment of functional links between *P. copri*  
49 and disease outcomes has been additionally complicated by its fastidious nature *in vitro*,  
50 tremendous strain-level diversity, resulting in the recent recognition of multiple genetically distinct  
51 clades and the lack of corresponding diverse isolates (Tett et al., 2019).

52 In contrast to *P. copri*, members of the genus *Bacteroides*, as the best example, have been  
53 extensively studied via a variety of genetic tools (Bencivenga-Barry et al., 2020; García-Bayona  
54 and Comstock, 2019; Goodman et al., 2011; Koropatkin et al., 2008; Lim et al., 2017; Mimee et  
55 al., 2015). These studies have, for instance, identified genes required for various bacterial  
56 physiological functions and provide approaches to investigate bacteria-host interactions. Of  
57 those, the genes for degrading plant- and animal-derived polysaccharides that are resistant to  
58 human digestion have been highlighted due to their important role in affecting bacterial fitness in  
59 the microbiome (Kaoutari et al., 2013; Porter and Martens, 2017; Wexler and Goodman, 2017).  
60 These genes are typically organized in so called polysaccharide utilization loci (PULs) that differ  
61 in polysaccharide specificity (Koropatkin et al., 2012). PULs are defined by the presence of one  
62 or more genes homologous to *Bacteroides thetaiotaomicron* *susD* and *susC* encoding outer  
63 membrane proteins that bind and import starch oligosaccharides (Martens et al., 2009; Shipman  
64 et al., 2000). The SusC/D protein complex (Glenwright et al., 2017) cooperates with diverse  
65 carbohydrate-degrading enzymes (CAZyme), e.g., glycosyl hydrolases (GHs) and polysaccharide

66 lyases (PLs), which are typically encoded in close proximity to the *susC/D* homologs in the  
67 genome. Most PULs in *B. thetaiotaomicron* contain genes encoding sensor-regulator systems,  
68 such as hybrid two-component systems (HTCSs) (Sonnenburg et al., 2006; Xu et al., 2003).  
69 HTCS proteins are chimeric proteins harboring the functional domains of a periplasmic sensor, a  
70 histidine kinase, and a DNA-binding response regulator enabling HTCSs to recognize distinct  
71 signal components degraded from complex carbohydrates and to initiate the upregulation of  
72 CAZyme-encoding genes in a positive feedback loop (Sonnenburg et al., 2006, 2010).  
73 Notably, higher prevalence of intestinal *Prevotella* spp. was found in populations consuming a  
74 plant-rich diet, e.g., vegetarians in Western populations (De Filippo et al., 2010; Fragiadakis et  
75 al., 2019; Ruengsomwong et al., 2016; Wu et al., 2011) suggesting that they encode efficient  
76 machineries for degradation of plant-derived polysaccharides. Yet, due to the lack of genetic tools,  
77 the characterization of carbohydrate utilization has been limited to bioinformatic and phenotypic  
78 studies (Fehlner-Peach et al., 2019; De Philippis et al., 2019). Specifically, two recent studies  
79 described extensive variability among clades and also strains within clades in the ability to directly  
80 utilize diverse complex plant carbohydrates (Fehlner-Peach et al., 2019; Tett et al., 2019). While  
81 combinations of comparative genomics and phenotypic assays can be used to predict the ability  
82 to utilize specific polysaccharides, such approaches rely on well-characterized genetic elements  
83 as a reference, which makes it difficult to identify genes with unknown functions and thereby  
84 hinders the establishment of casual relationship between the genetic content and phenotypes.  
85 Moreover, substrate predictions based on gene annotations from genetically distinct bacteria  
86 might be incomplete or inaccurate. This observation is supported by the presented data below  
87 that some *P. copri* strains harboring PULs lacking marker genes can still grow on the substrates  
88 for those PULs suggesting the functional redundancy between various PUL components.  
89 Here, we described a newly established genetic toolbox for approaching gene insertion, deletion,  
90 and complementation in *P. copri*. Using the genetic tools as well as high-throughput sequencing  
91 and bioinformatic analysis, we identified four highly conserved *P. copri* PULs responsible for  
92 utilization of specific plant polysaccharides via HTCS activation, and demonstrate that *P. copri*  
93 species have evolved two types of arabinan processing PULs. These studies not only build up a  
94 universal genetic manipulation system for an abundant bacterial species in the microbiome, but  
95 also present its applications on future efforts of understanding *P. copri* biology, e.g. nutrient  
96 acquisition. Because the workflow of establishing the genetic manipulation system for *P. copri*  
97 can be potentially modified and applied to other underexplored gut bacteria, our studies shed light  
98 on the future microbiome research on intricate interactions between bacteria-bacteria and host-  
99 bacteria during human health and disease.

## 100 **Results**

### 101 **Development of conjugation-based gene insertion system for *P. copri***

102 As targeted gene inactivation approaches enable gene function studies, they are frequently  
103 carried out in *Bacteroides* spp. by transferring a suicide plasmid from a donor strain into the  
104 recipient followed by selection of bacterial clones which underwent homologous recombination  
105 (Bencivenga-Barry et al., 2020; García-Bayona and Comstock, 2019; Koropatkin et al., 2008). To  
106 adapt the system for *P. copri*, we considered several key differences between *Bacteroides* spp.  
107 and *P. copri* including oxygen and antibiotic sensitivity as well as promoter sequences driving  
108 expression of the selectable marker gene.

109 Because oxygen exposure has been reported to promote mating between *Escherichia coli* (donor)  
110 and *Bacteroides* spp. (recipient) (Salyers et al., 1999), conjugation for *Bacteroides* spp. is  
111 routinely performed for at least 15 hours under aerobic conditions followed by transferring the  
112 cultures to anaerobic conditions permitting growth (Bencivenga-Barry et al., 2020; García-Bayona  
113 and Comstock, 2019). We initially tested aerotolerance of three *P. copri* strains, the type strain  
114 (DSM18205) and two strains (HDD04 and HDB01) from our lab collection containing recent  
115 isolates from healthy and diseased individuals (Figure 1A and Table S1). Exposure to air  
116 decreased viability three to four orders of magnitude for the *P. copri* strains within only four hours,  
117 which is in sharp contrast to *B. thetaiotaomicron* that displayed only a 28.6% drop in viability  
118 (Figure S1A). Hence, all genetic manipulations for *P. copri* were subsequently carried out in  
119 anaerobic conditions.

120 *E. coli* S17-1  $\lambda$ pir is commonly used as a donor for *Bacteroides* spp. in aerobic conditions, but it  
121 may show impaired growth under anaerobic conditions. Hence, we compared anaerobic growth  
122 of *E. coli* S17-1  $\lambda$ pir and another donor strain, *E. coli*  $\beta$ 2155 (Dehio and Meyer, 1997; Demarre et  
123 al., 2005). Notably, while *E. coli*  $\beta$ 2155 is auxotrophic for diaminopimelic acid (DAP), it displayed  
124 in the presence of DAP faster and more robust anaerobic growth compared to *E. coli* S17-1  $\lambda$ pir  
125 both in liquid culture and on agar plates (Figure S1B and S1C). Thus, we further tested the  
126 possibility of using *E. coli*  $\beta$ 2155 as the donor for delivering vectors into recipient *P. copri*.

127 The suicide plasmid, pExchange-tdk, is extensively used for gene deletion in *Bacteroides* spp.  
128 (Koropatkin et al., 2008). This plasmid possesses (1) a R6K origin limiting it to replicate only in  
129 host bacteria carrying the *pir* gene, and (2) an erythromycin resistant gene (*ermG*) for selecting  
130 *Bacteroides* transconjugants. Firstly, no *pir* homologs were identified in *P. copri* strains,  
131 suggesting the feasibility of using pExchange-tdk based vectors for plasmid integration in *P. copri*.  
132 Secondly, the susceptibility of *P. copri* strains to erythromycin was tested. From one type strain  
133 and 11 distinct strains of our collection representing four *P. copri* clades, eight strains from two

134 clades (Figure 1A) were sensitive to erythromycin driving us to initially utilize an erythromycin-  
135 based selection system (Table S2). To achieve a stable expression of *ermG* in *P. copri*, we  
136 inserted a strong promoter of a *P. copri* housekeeping gene, i.e. elongation factor Tu gene (*tuf*)  
137 (Figure S1D), in front of the *ermG* coding sequence into pExchange-tdk and removed the  
138 counterselection marker (thymidine kinase gene). These modifications resulted in a new shuttle  
139 vector referred to as pEx-insertion-ermG (Figure 1B and S2A). To consider potential negative  
140 positional effects for *P. copri* growth due to plasmid insertion, we individually cloned three different  
141 3-kb regions (DSM18205\_00642-43, 00941-42, and 02334-35) containing the 3'-end coding  
142 sequences of genes from *P. copri* DSM 18205, as homology arms for approaching plasmid  
143 integration without disrupting any functional genes. In addition, these DNA regions are relatively  
144 conserved in genomes of our *P. copri* isolates, allowing us to rapidly expand the testing into  
145 different strains.

146 The initial conjugation was performed between *E. coli*  $\beta$ 2155 carrying the respective plasmids and  
147 *P. copri* DSM 18205. Of note, *E. coli*  $\beta$ 2155 can grow weakly on BHI blood agar plates even  
148 without DAP based on our observations. Hence, after the co-incubation of *E. coli* and *P. copri* on  
149 BHI blood agar with DAP, besides erythromycin, we additionally added gentamicin to inhibit the  
150 *E. coli* donor and positively select for *P. copri* transconjugants. This selection yielded eight  
151 erythromycin resistant (Erm<sup>R</sup>) colonies only when pEx-insertion-ermG-DSM18205\_02334-35 was  
152 used, which indeed suggests the presence of positional effects (Figure 1B). Since  
153 DSM18205\_02334 encodes a putative  $\beta$ -glycosidase gene (*bgl*), we refer to the plasmid as pEx-  
154 insertion-ermG-DSM-bgl. Integration of the transferred plasmid was determined in three individual  
155 colonies and colony PCR amplified fragments expected for successful integration (Figure 1C and  
156 Table S1). DNA sequences of PCR products were further confirmed by Sanger sequencing (data  
157 not shown). We next attempted conjugation using pEx-insertion-ermG-HDD04-bgl and HDD04 as  
158 the conjugation recipient, which strikingly resulted in a more than 400-fold higher number of Erm<sup>R</sup>  
159 colonies (Figure 1H) suggesting a large strain variability in conjugation efficiency and prompting  
160 us to further optimize the approach.

161

### 162 **Optimization of conjugation-based gene insertion for *P. copri***

163 Building on these proof-of-concept data, the genetic elements of the plasmid and the conjugation  
164 procedures were systematically adjusted by varying factors that likely affect the conjugation  
165 efficiency. This included the promoter of *ermG*, the length of homology arm for plasmid  
166 integration, the donor *E. coli* strains and ratio of donor to recipient for conjugation, as well as the  
167 recipient *P. copri* strains.

168 First, an efficient expression of the selection marker is the prerequisite to obtain  $\text{Erm}^{\text{R}}$   
169 transconjugants. Besides the promoter of the *tuf* gene, we chose another six different promoters  
170 of housekeeping genes showing diverse gene expression in *P. copri* HDD04 in BHI liquid media  
171 supplemented with fetal bovine serum (BHI+S) (Figure 1D and S1D; Table S5). Notably, the  
172 numbers of transconjugants varied approximately 300-fold depending on the promoter, but none  
173 of the other promoters yielded higher numbers than *tuf* suggesting that high *ermG* expression  
174 levels are required for transconjugant survival under erythromycin selection (Figure 1D and S1D).  
175 Second, comparison of homology arms between 0.5-kb to 4-kb demonstrated the highest yield of  
176 transconjugants with homology arms of 3- and 4-kb (Figure 1E). Third, we assessed the above-  
177 mentioned *E. coli* strains as conjugation donors. In line with the ability for anaerobic growth,  
178 conjugation with donor *E. coli*  $\beta$ 2155 increased the yield of transconjugants for both DSM 18205  
179 and HDD04 approximately 85-fold compared to *E. coli* S17-1  $\lambda$ pir, indicating the advantage of  
180 donor strain for advancing anaerobic conjugation (Figure 1F). More transconjugants were also  
181 obtained as ratio of donor to recipient increased until 100:1, after which it decreased again (Figure  
182 1G). Last, we evaluated a larger panel of  $\text{Erm}^{\text{S}}$  *P. copri* strains using strain-specific homology  
183 arms as extensive sequence variations among strains are present. Except for one strain with  
184 undetectable production of  $\text{Erm}^{\text{R}}$  colonies all other seven strains exhibited extensive diversity in  
185 the number of transconjugants varying by approximately  $10^4$ -fold between the strains with the  
186 lowest (RPA01, mean=5 CFUs) and highest (HDA03, mean= $2.4 \times 10^4$  CFUs) yield (Figure 1H).  
187 While these iterative improvements allowed the targeted insertion in seven strains from the clade  
188 A and “E” (a newly observed clade, unpublished observation), the other four strains from the clade  
189 A, C and D could not be assessed due to their  $\text{Erm}^{\text{R}}$  phenotype (Table S2). Hence, we screened  
190 the antibiotic susceptibility of HDD04 and DSM 18205 identifying tetracycline, chloramphenicol,  
191 and spectinomycin as additional selective antibiotics (Table S2). Next, *P. copri* HDD04 was  
192 utilized to test the feasibility of tetracycline, chloramphenicol, and spectinomycin resistance  
193 genes, i.e. *tetQ*, *catA*, *aadA*, for selection. Conjugation using pEx-insertion carrying *tetQ* (pEx-  
194 insertion-tetQ-bgl, Figure S2B), but not *catA* or *aadA*, successfully resulted in HDD04  
195 transconjugants after selection with the respective antibiotics. We therefore performed the  
196 conjugation for four  $\text{Erm}^{\text{R}}$  but tetracycline-sensitive ( $\text{Tet}^{\text{S}}$ ) strains, i.e., RHA03, HDE04, HDE06,  
197 and HDD05, followed by tetracycline selection, resulting in tetracycline resistant ( $\text{Tet}^{\text{R}}$ )  
198 transconjugants (mean=8.3 to  $1.2 \times 10^4$  CFUs) (Figure 1I).  
199 In summary, the comprehensive and stepwise adaptation of a gene insertion system to a  
200 genetically inaccessible bacterium, i.e. *P. copri*, illustrates the significant influence of multiple  
201 variables for a successful production of genetic mutants, thereby providing a valuable template

202 for initiating the construction of genetic tools for other commensals in the future. These  
203 experiments together demonstrate the feasibility of gene insertion in *P. copri* strains from distinct  
204 clades enabling functional studies.

205

### 206 **Genetic inactivation of PUL regulators to identify their polysaccharide substrates**

207 The prevalence and relative abundance of *P. copri* has been linked to plant-rich diets in humans  
208 and mouse models (De Filippo et al., 2010; Fragiadakis et al., 2019; Gálvez et al., 2020;  
209 Kovatcheva-Datchary et al., 2019; Ruengsomwong et al., 2016; Wu et al., 2011), yet the  
210 underlying molecular mechanism is still poorly understood. To demonstrate the utility of our gene  
211 insertion system in identifying gene functions, we decided to investigate the genetic basis for  
212 utilization of distinct carbohydrates in *P. copri*. Since no available chemically-defined cultivation  
213 system for *P. copri* exist thus far, we modified the minimal medium (MM) (Martens et al., 2008)  
214 originally used for cultivation of *B. thetaiotaomicron* by supplementing additional defined nutrients  
215 (see Methods), enabling the growth of all *P. copri* strains tested from our strain collection (n=12)  
216 with glucose as a sole carbon source (Table S3). Specifically, 10 out of 12 strains reached a  
217 maximal optical density (OD<sub>600</sub> max) of 0.6-1.0 in MM+Glucose overnight, while two strains  
218 (HDA03 and RHA03) showed only moderate growth (approximately OD<sub>600</sub> max 0.3). This minimal  
219 medium was then used to extensively characterize polysaccharide utilization in HDD04, as it  
220 showed robust growth in MM and high number of transconjugants. HDD04 grew on various plant  
221 cell wall pectins, such as arabinan, arabinogalactan, and arabinoxylan (Table S3). Beyond the  
222 utilization of plant cell wall glycans, HDD04 also showed growth on plant and animal cell storage  
223 carbohydrates such as inulin (0.651±0.016) and glycogen (0.818±0.026), but grew poorly on levan  
224 (0.122±0.009), and could not grow on starch. In parallel, PULs were identified in *P. copri* using a  
225 bioinformatic approach PULpy (Stewart et al., 2018) followed by manual curation. Specifically, the  
226 PUL repertoire of HDD04 was predicted based on *susC/D*-like pairs resulting in 29 PULs in  
227 comparison with 19 PULs in the *P. copri* reference strain (DSM 18205) (Table S3), suggesting a  
228 much broader carbohydrate utilization capability of HDD04 compared to DSM 18205. CAZymes  
229 surrounding the *susC/D*-like pairs were annotated using a bioinformatic approach (dbCAN2 tool)  
230 (Zhang et al., 2018).

231 To directly link distinct PULs and growth phenotypes on polysaccharides, we focused on HTCS  
232 genes, the typical activator associated with PULs (Sonnenburg et al., 2006, 2010). Genome-wide  
233 screening for HTCS genes in HDD04 by homology search using the known domains of HTCS  
234 (Terrapon et al., 2015) combined with a protein BLAST on National Center for Biotechnology  
235 Information (NCBI) identified ten gene candidates as our targets. We associated nine out of ten

236 HTCS gene candidates with their closest predicted PULs (e.g. HDD04\_00018 is named as *htcs*-  
237 PUL3) with only HDD04\_0019 being a solitary HTCS gene.

238 Ten HTCS insertion mutants were generated by integrating a modified pEx-insertion-ermG  
239 plasmid (Figure S2C) into the coding sequences of their periplasmic sensor domains followed by  
240 a screening for growth defects in MM plus polysaccharides to identify their respective substrates  
241 (Figure 2A). Of note, to block potential effects of transcriptional and translational readthrough for  
242 the HTCS genes after plasmid integration, pEx-insertion-ermG was modified to include T1-T2  
243 terminators and TAA encoding stop codon in front of the cloned homology arm, respectively (pEx-  
244 insertion-ermG-T1T2; Figure 2A and Figure S2C). A strain with plasmid integrated into an  
245 intergenic region (between HDD04\_00165 and 00166) was utilized as a positive control. The  
246 polysaccharides (n=15) that can support the growth of HDD04 to an OD<sub>600</sub> max of > 0.2 within  
247 120 hours were investigated (Figure 2B). Compared to the control strain, 6/10 HTCS gene  
248 mutants displayed similar growth patterns, e.g., *htcs*-PUL3, as shown in Figure 2B, demonstrating  
249 that they are not essential for growth on the tested polysaccharides. Strikingly, the other four  
250 HTCS mutants each showed dramatic growth defects (OD<sub>600</sub> max < 0.1) on only one specific  
251 polysaccharide (Figure 2C and 2D). Specifically, gene disruptions of *htcs*-PUL14, -PUL21, -  
252 PUL24, and -PUL26 abolished the capacities of HDD04 grown on arabinan, pectic galactan,  
253 arabinoxylan, and inulin, respectively (Figure 2C and 2D). To link the HTCS gene and the nearest  
254 PUL for easy identification, we have tentatively designated these genes as *htcs*<sup>D-Ara</sup> (*htcs*-PUL14,  
255 HDD04\_02372), *htcs*<sup>D-PecGal</sup> (*htcs*-PUL21, HDD04\_02939), *htcs*<sup>D-AraXyl</sup> (*htcs*-PUL24,  
256 HDD04\_03129), and *htcs*<sup>D-Inu</sup> (*htcs*-PUL26, HDD04\_03217).

257 Together, these experiments not only demonstrate the utility of the gene inactivation strategies to  
258 perform functional studies in *P. copri*, but also uncovered the link between PUL associated  
259 regulatory genes and metabolic phenotypes on utilizing specific polysaccharides for *P. copri*.

260

### 261 **Construction of an allelic exchange system for validating the function of PUL regulators** 262 **on polysaccharide degradation**

263 Although our genetic insertion system is efficient in generating mutants for rapid determinations  
264 of phenotypes, it has some limitations: (1) the selective pressure provided by antibiotics is constantly  
265 required in the medium for plasmid integrants with corresponding antibiotic resistance markers;  
266 (2) it would be challenging to target relatively smaller genes because the yield of conjugants is  
267 negatively correlated with the homology arm cloned in the conjugative plasmid as shown in Figure  
268 1E; (3) the integration of the plasmid may cause a polar effect on the expression of downstream  
269 genes, especially complicating the characterization of each gene's role in an operon. Therefore,



270 we aimed to establish an allelic exchange system for unmarked gene deletion and  
271 complementation in *P. copri*. One of the most widely used system for allelic exchange in bacteria  
272 is based on the levansucrase gene (*sacB*), which catalyzes the hydrolysis of sucrose and  
273 synthesizes the toxic compound levan (Gay et al., 1985; Recorbet et al., 1993). Two key criteria  
274 have been identified to limit its application: (1) The inability of bacteria to grow properly on agar  
275 plates in the presence of relatively high concentrations of sucrose and (2) whether the expression  
276 of *sacB* can effectively select gene deletion mutants in the presence of sucrose.

277 Hence, we first determined the growth of *P. copri* DSM18205 and HDD04 on agar plates with  
278 increasing concentrations of sucrose. As media base, we employed yeast extract and tryptone  
279 (YT) supplemented with horse blood instead of BHI to reduce salt concentrations, which have  
280 been demonstrated to decrease the sucrose sensitivity of *E. coli* (Blomfield et al., 1991) and have  
281 been observed by us to interfere with *P. copri* growth on high sucrose concentration (data not  
282 shown). Both strains showed the normal colony numbers and morphology until a sucrose  
283 concentration of 6%, while *E. coli* tolerated up to 10% sucrose (Figure S3A). The inability to grow  
284 under these conditions was likely caused by osmotic pressure, as similar results were obtained  
285 for *P. copri* strains with increasing the concentration of glucose in YT+blood agar (Figure S3B).  
286 In order to ensure the selectivity of sucrose without affecting growth of *P. copri*, a working  
287 concentration of 5% sucrose was chosen. Notably, 5/10 strains were not able to grow in the  
288 YT+blood media in absence of sucrose reflecting their distinct nutritional requirements compared  
289 to other strains (Figure 3B and S3C).

290 Next, a derivative vector of pEx-insertion-ermG named pEx-deletion-ermG was created by joining  
291 the promoter of *gdhA* gene to a promoterless copy of *sacB* and inserting it downstream of *ermG*  
292 (Figure 3A and S2D). The homology arm for targeting the *bgl* gene (Figure 2A) was cloned into  
293 the pEx-deletion-ermG, resulting in pEx-deletion-ermG-HDD04-bgl. We individually integrated the  
294 pEx-deletion-ermG-bgl and pEx-insertion-ermG-bgl into HDD04 (Figure 3B). Erm<sup>R</sup> colonies were  
295 readily obtained for both plasmids and displayed normal colony morphology as wild type,  
296 indicating that the expression of *sacB* did not affect the growth of *P. copri* in the absence of  
297 sucrose (Figure 3B). Plating these Erm<sup>R</sup> colonies containing pEx-deletion-ermG-bgl in the  
298 presence of sucrose significantly reduced CFU by 10<sup>4</sup>-fold (Figure 3B). In contrast, the same  
299 strain carrying pEx-insertion-ermG-bgl exhibited equivalent viability in the presence and absence  
300 of sucrose. These results illustrated that expression of *sacB* effectively functioned as sucrose-  
301 based selection.

302 We subsequently assessed the false positive rate of this counterselection system by plating Erm<sup>R</sup>  
303 on YT+Erm+Suc plates and found that approximately 1 out of 6.7×10<sup>5</sup> cells in the bacterial

304 population were Suc<sup>R</sup> but still Erm<sup>R</sup>, i.e. carried the plasmid. Of note, 50 from 500 colonies were  
305 randomly picked and restreaked on YT+Erm and YT+Suc plates to evaluate whether the Suc<sup>R</sup>  
306 phenotype of these “escapers” was due to genetic mutations. Unexpectedly, they all showed Erm<sup>R</sup>  
307 but Suc<sup>S</sup> phenotypes. We further sequenced the *sacB* gene and its promoter sequences in 10  
308 random-selected clones, yet none of them had mutations. This suggested that the Suc<sup>R</sup>  
309 phenotype of these escapers were attributable to phenotypic but not genetic causes. Similar level  
310 of selectivity in the *sacB*-sucrose based system was recapitulated in other five *P. copri* strains  
311 (Figure S2D, S2E, and S3D). Taken together, these results demonstrate the utility of the *sacB*-  
312 based counterselection system for targeted allelic exchange in *P. copri*.

313

### 314 **Genetic deletion and complementation demonstrate essential function of HTCS genes on** 315 **degrading plant polysaccharides**

316 As a proof of concept, we chose two HTCS genes, *htcs*<sup>D-Ara</sup> and *htcs*<sup>D-Inu</sup> as our targets for genetic  
317 deletion and complementation. A schematic for describing the allelic exchange methodology  
318 during gene-editing process including plasmid construction, allelic exchange, and mutant  
319 selection is presented in Figure 3A. In brief, we (1) cloned up- and down-stream regions of the  
320 target gene into the pEx-deletion-ermG plasmid and transferred the plasmid into *E. coli*  $\beta$ 2155;  
321 (2) performed conjugation between *P. copri* and *E. coli* carrying the plasmids followed by selection  
322 of plasmid integrants (1<sup>st</sup> recombination); (3) passaged the Erm<sup>R</sup> clones without any selection,  
323 permitting the spontaneous allelic exchange (2<sup>nd</sup> recombination); (4) carried out the selection of  
324 bacteria that had lost the plasmid (revertant and deletion mutant); (5) validated the Erm<sup>S</sup>  
325 phenotype of selected clones and screened for the clones with gene deletion mutations. Of note,  
326 PCR screening and Sanger sequencing of Erm<sup>S</sup> clones obtained after the counterselection step  
327 revealed that 37.5% to 56.3% of clones are confirmed deletion mutants (Table S4) with all  
328 remaining clones being revertants, showing the precise performance of our targeting system.  
329 Following these procedures, *htcs*<sup>D-Ara</sup> and *htcs*<sup>D-Inu</sup> were successfully deleted in HDD04,  
330 generating  $\Delta$ *htcs*<sup>D-Ara</sup>, and  $\Delta$ *htcs*<sup>D-Inu</sup> gene deletion strains accordingly (Figure 3C). We  
331 subsequently complemented the deletion mutants with the corresponding HTCS genes,  
332 respectively, through a similar genetic procedure except that we cloned the target gene and its  
333 flanking regions into pEx-deletion-ermG (Figure 3C). In line with our previous findings in Figure  
334 2D, the HTCS-deficient mutants failed to grow on their previously identified substrates, while  
335 complementation of HTCS genes in the mutant strains restored the growth to the levels of the  
336 wild type HDD04 strain (Figure 3D).

337 To demonstrate that the allelic exchange system can be also applied to *P. copri* strains with  
338 relatively lower yields of transconjugants, individual deletion of homologous *htcs*<sup>D\_Inu</sup> genes were  
339 performed in the DSM 18205 (*htcs*<sup>DSM\_Inu</sup>, DSM18205\_02724) and HDB01 (*htcs*<sup>B\_Inu</sup>,  
340 HDB01\_02906) strains (Figure S3E). Similarly, deletion of *htcs*<sup>D\_Inu</sup> displayed dramatic growth  
341 defects in both DSM 18205 and HDB01, respectively (Figure 3E).

342 In conclusion, these results demonstrate the utility of our novel allelic exchange system in the  
343 type strain and other *P. copri* isolates for establishing a causal relationship between genotypes  
344 and phenotypes, as best exemplified by specific HTCS genes and the growth phenotypes on  
345 arabinan and inulin.

346

### 347 **Plant-derived polysaccharides induced the transcription of distinct PUL-associated genes** 348 **in vitro and in vivo**

349 To determine whether polysaccharides induce the expression of specific PULs associated with  
350 the identified HTCS genes or rather broader changes in multiple PULs, we performed  
351 transcriptome profiling of *P. copri* HDD04 cultures grown in MM supplemented with either glucose  
352 or one of four plant polysaccharides as the sole carbohydrate (Table S5). As we expected, the  
353 *susC/D*-like elements in PUL14, 21, 24, and 26 exhibited the largest upregulation upon their  
354 respective polysaccharide substrates compared to MM+Glucose (Figure 4A), further confirming  
355 our genetic characterization (Figure 2 and 3). We therefore defined these four PULs as PUL<sup>D\_Ara</sup>,  
356 PUL<sup>D\_PecGal</sup>, PUL<sup>D\_AraXyl</sup>, and PUL<sup>D\_Inu</sup> (Figure 4B). Using average fold-change of *susC/D*-like  
357 genes in each PUL as reference, PUL<sup>D\_Inu</sup> showed a relatively low (3.3-fold) upregulation in  
358 response to inulin, whereas PUL<sup>D\_Ara</sup>, PUL<sup>D\_PecGal</sup>, and PUL<sup>D\_AraXyl</sup> displayed much higher induction  
359 levels (PUL<sup>D\_Ara</sup>: 266.1-fold; PUL<sup>D\_PecGal</sup>: 983.7-fold; PUL<sup>D\_AraXyl</sup>: 159.3-fold; Figure 4A). It is worth  
360 noting that the disruption of HTCS gene in PUL24 resulted in the growth deficiency on  
361 arabinoxylan, but did not affect the growth pattern on xylan (Figure 2C and Figure 4A). This is in  
362 disagreement with a previous prediction, which was based on bioinformatic analysis and growth  
363 assays, of a PUL24 homolog being a xylan processing PUL (Figure S4A) (Fehlner-Peach et al.,  
364 2019). Interestingly, genome-wide only *susC/D*-like genes from PUL<sup>D\_Inu</sup> were significantly  
365 upregulated, indicating an extremely specific system for processing inulin by *P. copri*. Yet, multiple  
366 *susC/D*-like elements were induced (>10-fold change) by the other three plant-derived  
367 polysaccharides (Figure 4A). For instance, *susC/D*-like pairs in PUL<sup>D\_PecGal</sup> (PUL24, 23.9-fold)  
368 were also greatly expressed when cells were exposed to arabinan. The transcriptional response  
369 of *susC* homologs in four identified PULs to each tested polysaccharide were further validated by  
370 real-time quantitative PCR (RT-qPCR) (Figure 4C). Hence, we hypothesized that the multiple

371 PULs are response to the degradation products of plant polysaccharides, e.g., PUL<sup>D\_PecGal</sup> was  
372 likely induced by the degraded components of pectin fragment attached to the main-chain  
373 arabinofuranosyl residues of sugar beet arabinan (Figure S4B). Surprisingly, PUL15  
374 (HDD04\_02377-87) possesses genes encoding GH13 and GH97, which were previously  
375 demonstrated to degrade various glucans (Cerqueira et al., 2020; Koropatkin et al., 2008), was  
376 commonly upregulated by arabinan, pectic galactan, and arabinoxylan. Besides the regulation of  
377 PUL-associated genes, there were also genes encoding polysaccharide catabolism enzymes that  
378 displayed >10-fold upregulation by the polysaccharides, e.g. one putative extracellular exo-alpha-  
379 L-arabinofuranosidase precursor gene in MM+Arabinan (HDD004\_02362, Table S5). Similarly, a  
380 putative gene operon was strongly upregulated in response to arabinan and arabinoxylan, which  
381 has a high similarity to the arabinose utilization system in *B. thetaiotamicron* (Schwalm et al.,  
382 2016) (Figure S4D).

383 To identify whether *P. copri* actively utilizes these PULs *in vivo*, a metatranscriptome analysis was  
384 performed from a stool sample collected from the donor, from which HDD04 was isolated.  
385 Strikingly, except PUL<sup>D\_Inu</sup> that displayed a slightly increased transcription compared to  
386 MM+Glucose (average of fold-change *susC/D*-like genes: 1.2-fold), the *susC/D* homologs in the  
387 other three identified PULs (PUL<sup>D\_Ara</sup>: 4.2-fold; PUL<sup>D\_PecGal</sup>: 215-fold; PUL<sup>D\_AraXyl</sup>: 44.6-fold) were  
388 actively expressed. Moreover, 16 other PULs displayed upregulation from 2.36-fold (PUL1) to  
389 more than 8000-fold change (PUL25), which suggests additional substrates from the human diet  
390 can be targeted by various PULs in *P. copri* (Figure 4A). Collectively, these analyses illustrate  
391 that *P. copri* carries out an efficient and diverse polysaccharide processing by orchestrating its  
392 associated gene expression profile *in vitro* and *in vivo*. Further functional gene studies will be  
393 required to understand which polysaccharides can be utilized *in vivo* by *P. copri*.

394  
395 **PUL<sup>D\_Ara</sup>, PUL<sup>D\_PecGal</sup>, PUL<sup>D\_AraXyl</sup> and PUL<sup>D\_Inu</sup> are conserved among genetically diverse *P.***  
396 ***copri* strains**

397 Recent studies reported that *P. copri* isolates exhibited extensive genomic and phenotypic  
398 variations (Fehlner-Peach et al., 2019; De Filippis et al., 2019; Tett et al., 2019). To examine  
399 whether utilization of arabinan, pectic galactan, arabinoxylan, and inulin is a common capacity  
400 based on the genetic content of *P. copri* species, we performed a comparative genomic analysis  
401 to identify corresponding PULs in strains from our *P. copri* strain collection. Notably, PULs  
402 carrying homologous HTCS/SusC genes compared to HDD04 were found in each of the *P. copri*  
403 strains (Table 1 and S3; Figure S5). The gene organization and content of these PULs varied  
404 from conserved, e.g. PUL<sup>AraXyl</sup>, to variable, e.g. PUL<sup>Inu</sup> (Figure S5). Hence, we next determined

405 the growth in MM supplemented with arabinan, pectic galactan, arabinoxylan, or inulin. Most *P.*  
406 *copri* strains grew on the tested polysaccharides with the exception of HDA03 that could not grow  
407 on pectic galactan and arabinoxylan (Figure S5). Strikingly, genetic evidence potentially  
408 explaining the inability to use specific polysaccharides could be easily identified (Figure S5).  
409 Specifically, natural mutations in the HTCS genes of PUL<sup>AraXyl</sup>, i.e. a truncation of HTCS<sup>AraXyl</sup>, and  
410 of PUL<sup>PecGal</sup>, i.e. deletion, are responsible for the “no growth” phenotypes of HDA03 on these  
411 polysaccharides. Additionally, the cognate first *susC* gene of PUL<sup>AraXyl</sup> as well as the SGBP gene  
412 of PUL<sup>PecGal</sup> were truncated into two segments in HDA03, which could further contribute to the  
413 inability to utilize these polysaccharides.  
414 Notably, the PUL<sup>PecGal</sup> in HDE04 and HDD12 and PUL<sup>Inu</sup> in HDD05 and HDD12 do not contain  
415 *susC/D*-like elements, suggesting that they are non-essential for utilizing pectic galactan and  
416 inulin in these host strains. These cases of “incomplete” PULs highlight the limitations of using  
417 *susC/D* homologs as genetic markers to predict the growth phenotypes on specific  
418 polysaccharides substrates.

419

#### 420 **Two types of arabinan processing PULs in *P. copri* display clade-specific distribution and** 421 **diet-dependent expansion in the human gut microbiome**

422 While functionally all tested strains were able to use arabinan, we found that the arabinan  
423 processing PULs genetically displayed two distinct structures among the 12 strains (Table 1).  
424 Specifically, two strains from clade A and the single strain from clade E feature an almost identical  
425 gene organization with a SGBP-like gene in front of two pairs of *susC/D*-like genes, whereas the  
426 remaining strains from clade A, as well as the strains from clade C and D encode a single pair of  
427 *susC/D*-like genes followed by a SGBP-like gene. In the following we refer to two types of PULs  
428 as type-I (single copy) and type-II (tandem repeat), and the two *susC/D*-like pairs in type-II PUL<sup>Ara</sup>  
429 as *susC1*, *susD1*, *susC2*, and *susD2*, respectively. Of note, similar PUL<sup>Ara</sup> types have been  
430 noticed in *Phocaeicola vulgatus* (formerly *Bacteroides vulgatus*) with type-I and *B.*  
431 *thetaiotaomicron* with type-II (Table 1) (Lynch and Sonnenburg, 2012; Martens et al., 2011;  
432 Patnode et al., 2019).

433 Phylogenetic analysis of protein sequences encoded by HTCS genes from the 12 *P. copri* strains  
434 as well as *P. vulgatus* ATCC 8482 and *B. thetaiotaomicron* VPI-5482 shows a clade-driven  
435 evolutionary pattern, which closely resembled that of genome-based tree of the *P. copri* complex  
436 (Figure 1A). The inability of the mutant strain DSM18205 *htcs*<sup>DSM\_Ara</sup> to grow on arabinan validates  
437 that the HTCSs of two arabinan utilizing systems are functionally conserved in the two types of

438 PUL<sup>Ara</sup> (Figure 5B). In contrast, the *P. copri*-derived SusC and SusD homologs form three distinct  
439 evolutionary branches in the tree that differ from the proteins in *B. thetaiotaomicron* and *P.*  
440 *vulgatus*, but still show a relative similarity of these proteins corresponding to the PUL<sup>Ara</sup> types,  
441 respectively (Figure 5A and S6A). Similar to the *susC/D*-like genes, the SGBP-like proteins are  
442 clustered by PUL<sup>Ara</sup> type rather than *P. copri* clade (Figure S6B). We next performed functional  
443 studies complementing the phylogenetic analysis. Because the *susC1* gene but not the *susC2*  
444 gene is required in *B. thetaiotaomicron* for growth on arabinan as described previously (Luis et  
445 al., 2018), the genes encoding *susC* in type-I, and *susC1* and *susC2* in type-II system of *P. copri*  
446 were individually in-frame deleted to explore their necessity in *P. copri* (Figure 5B). In agreement  
447 with previous observations in *B. thetaiotaomicron*, only *susC1* but not *susC2* is essential for type-  
448 II PUL<sup>Ara</sup> carrier HDD04 (Figure 5B). Moreover, deletion of *susC* in type-I PUL<sup>Ara</sup> abolished the  
449 growth capacity of *P. copri* DSM 18205 on arabinan (Figure 5B). These results indicated that *P.*  
450 *copri* strains encode highly similar sensory/regulatory systems for sensing arabinan-derived  
451 ligands and transcriptional activation of PUL<sup>Ara</sup>, but that PUL<sup>Ara</sup> encodes distinct modules, i.e.  
452 *susC-susD-SGBP* in type-I and *SGBP-susC1-susD1-susC2-susD2* in type-II, for carbohydrate  
453 binding and importing.

454 To gain a broader understanding of the prevalence of PUL<sup>Ara</sup> types in *P. copri* as well as related  
455 *Prevotella* spp., *Bacteroides* spp. and *Phocaeicola* spp., PUL<sup>Ara</sup> were predicted from 1602 non-  
456 redundant genomes retrieved from the NCBI genome database (n=1504) and from a recent  
457 comprehensive metagenomic *P. copri* survey (n=98) (Tett et al., 2019). Together with our strains  
458 (n=12), we identified that 499 out of 1614 genomes encode either type-I or type-II PUL<sup>Ara</sup>,  
459 suggesting that the arabinan utilization potential is frequently found in these genera but not  
460 ubiquitous (Figure 5C and Table S6). In agreement with the results from the analysis of our limited  
461 strain collection, type-I PUL<sup>Ara</sup> is present in *P. copri* clades A (55.3%), C (72.7%) and D (75%),  
462 while the type-II is encoded by *P. copri* strains from the clade A (36.8%) and the single strain from  
463 the clade E (HDD12) (Figure 5C). Notably, none of the two types as well as the arabinose  
464 utilization operon we identified was found in any of the 53 screened genomes of clade B strains  
465 (Figure 5C), which is consistent with previous reports that this clade lacks the genes and capacity  
466 for arabinose and arabinan utilization (Tett et al., 2019). The two types of PUL<sup>Ara</sup> are also  
467 widespread in other members of the *Prevotella* spp., *Bacteroides* spp. and *Phocaeicola* spp.  
468 (Figure 5C). Notably, our extended analysis shows that while some species displayed either a  
469 type I- or type II-dominated distribution, e.g., *P. vulgatus* (n=90 genomes, type-I: 90%, type-II:  
470 0%), other species such as *Phocaeicola plebeius* (n=20 genomes, type-I: 20%, type-II: 50%) and  
471 *B. thetaiotaomicron* (n=42 genomes, type-I: 7.14%, type-II: 88.1%) displayed both types of

472 arabinan utilization systems similar to *P. copri* species (Figure 5C). As the evolutionary analysis  
473 of *Bacteroides* spp. and *Phocaeicola* spp. is limited, these dominations could also result from the  
474 clade-specific distribution as *P. copri*. Interestingly, only 1 out of 55 *Bacteroides ovatus* genomes  
475 carry type-I PUL<sup>Ara</sup>, which not only suggests the occurrence of horizontal gene transfer of type-I  
476 PUL<sup>Ara</sup> between *B. ovatus* and other type-I PUL<sup>Ara</sup> carriers (Figure 5C), but also provides an  
477 explanation for the apparent lack of arabinan utilization in most *B. ovatus* strains (Martens et al.,  
478 2011).

479 The increased relative abundance of *P. copri* in the gut microbiota has been associated with fiber-  
480 rich diets (De Filippo et al., 2010; Fragiadakis et al., 2019; Ruengsomwong et al., 2016; Wu et al.,  
481 2011). As the *in vitro* results described above suggest a potential contribution of the PUL<sup>Ara</sup> for  
482 fitness advantage within the ecosystem, we investigate whether *P. copri* encoding different types  
483 of PUL<sup>Ara</sup> displays a diet-modulated abundance in the human gut. Therefore, we performed a  
484 specialized analysis of a publicly available dataset from one recent study comparing the  
485 differences in the gut microbiota of individuals consuming omnivore, vegetarian, and vegan diet  
486 (De Filippis et al., 2019). In a previous study, we identified five distinct *P. copri* metagenome-  
487 assembled genomes (MAGs) from four clades in individuals of that cohort (Figure 5D). MAG610  
488 (clade C) encodes a type-I PUL<sup>Ara</sup>, whereas two MAGs 609 and 611 (clade A and C) carry the  
489 type-II counterpart. Two MAGs 612 and 613 (clade C and B) contain neither of the PULs (Figure  
490 5D). The relative abundance of each MAG was then calculated per individual and grouped based  
491 on the presence of type-I or type-II PUL<sup>Ara</sup> in the individuals with three distinct dietary preferences  
492 (Figure 5D). While there was no significant difference based on PUL<sup>Ara</sup> presence and type in  
493 omnivore and vegetarian diets, remarkably, in vegans, PUL<sup>Ara</sup> type-II positive MAGs showed  
494 higher abundance than those with type-I PUL<sup>Ara</sup> (Figure 5D). This suggests that *P. copri* strains  
495 specifically benefit from type-II PUL<sup>Ara</sup> under particular dietary conditions. Further genetic and  
496 functional characterizations will be required to further understand the differential precise nature  
497 of two PUL<sup>Ara</sup> systems. Yet, taken together our comprehensive analyses illustrate the importance  
498 of arabinan utilization systems for *P. copri* fitness *in vitro* and *in vivo*.

499

## 500 Discussion

501 Studying the biology of many human commensals is hindered by diverse obstacles, e.g.  
502 challenging cultivation, extensive strain-level variation, low number of publicly available strains,  
503 and the lack of genetic tools (Fehlner-Peach et al., 2019; De Filippis et al., 2019; Ley, 2016; Tett  
504 et al., 2019). In this study, we developed a genetic toolkit that allows versatile genetic  
505 manipulations for a wide range of *P. copri* strains, and applied our genetic platform coupled with  
506 genomic, transcriptomic, and phenotypic approaches to provide insights into the genetic basis of  
507 polysaccharide utilization of this prevalent gut bacterium. Particularly, the recognition that  
508 *Prevotella* spp. including *P. copri* are a dominant part of the “non-westernized” microbiome as  
509 well as their unexplained antagonism with *Bacteroides* spp. has elevated the interest in the  
510 members of this genus (Arumugam et al., 2011; Costea et al., 2017; Johnson et al., 2017; Ley,  
511 2016). While a series of genetic tools have been created for the genus *Bacteroides* (Bencivenga-  
512 Barry et al., 2020; García-Bayona and Comstock, 2019; Goodman et al., 2011; Koropatkin et al.,  
513 2008; Lim et al., 2017; Mimee et al., 2015), none have been reported for *P. copri* despite its  
514 diverse associations to human diseases. Moreover, few functional genetic studies reported on  
515 targeting genes in animal-derived *Prevotella*, i.e. *Prevotella ruminicola* (Gardner et al., 1996;  
516 Ogata et al., 1999; Shoemaker et al., 1991) and *Prevotella bryantii* (Accetto and Avguštin, 2007;  
517 Accetto et al., 2005). Together, this suggests the existence of limitations preventing the simple  
518 transfer of established genetic tools to *P. copri*.

519 Here, by redesigning and optimizing the key genetic elements in the conjugative plasmids and  
520 experimental procedures, we developed an anaerobic conjugation based system, which  
521 overcomes the genetic intractability of diverse *P. copri* strains. For instance, the optimization of  
522 promoter strength for the selection marker resulted in a 306.6-fold increase in conjugation  
523 outcomes. Another key factor was the evaluation of different donor and recipient strains improving  
524 conjugation outcome by 83.7-fold and up to 14,160-fold, respectively. Of note, naturally occurring  
525 antibiotic resistances can complicate gene targeting, but the combination of plasmids carrying  
526 either *ermG* or *tetQ* antibiotic markers allowed the generation of insertion mutants for 11 out of  
527 12 *P. copri* strains in our strain collection representing four distinct clades.

528 In a proof-of-concept of our approach, we focused on one strain, i.e., HDD04, with high  
529 conjugation capacity and robust growth in chemically defined medium, targeting ten HTCS  
530 regulators for controlling PUL expression, and identified four HTCS genes with essential functions  
531 in utilizing plant polysaccharides. Next, we adapted the *sacB*-sucrose system to *P. copri* that  
532 enabled the selection of mutants after allelic exchange with a  $3.1 \times 10^{-7}$  to  $4.9 \times 10^{-6}$  false positive  
533 rate. This efficacy is similar to the that obtained for a recent system used for allelic exchange in



534 *Bacteroides* spp. (Bencivenga-Barry et al., 2020). Of note, compared to other counterselection  
535 systems, such as the genes encoding 30S ribosomal protein S12 (*rpsL*) for Proteobacteria and  
536 thymidine kinase (*tdk*) for *Bacteroides* spp. (Dean, 1981; Koropatkin et al., 2008; Reyrat et al.,  
537 1998), the *sacB*-sucrose system does not require any genetic modification of the recipient strain  
538 in advance. The utility of the *sacB*-sucrose system was demonstrated by deletion of HTCS genes  
539 in three strains, including ones with relatively lower conjugation capacity. Despite these  
540 advantages, the allelic exchange system for *P. copri* does have limitations, e.g. it requires multiple  
541 selection steps and the ability to tolerate the osmotic pressure of high sucrose concentrations.  
542 Other counterselection markers, such as inducible antibacterial effectors (Bte1 and Bfe1) utilized  
543 in *Bacteroides* species (Bencivenga-Barry et al., 2020; García-Bayona and Comstock, 2019), can  
544 be envisioned, yet it has been noticed that *P. copri* DSM 18205 was not affected by the Bfe1  
545 effector (Chatzidaki-Livanis et al., 2016). Another limitation relates to complementation of gene  
546 deletions, e.g. in *B. thetaiotaomicron*, genetic complementation is accomplished by integrating a  
547 plasmid carrying the complemented gene into the chromosome (Koropatkin et al., 2008; Wang et  
548 al., 2000). Specifically, the integration vector pNBU2 encodes a tyrosine integrase, which  
549 mediates sequence-specific recombination between the attN site of pNBU2 and one of two attBT  
550 sites located in the 3' ends of the two tRNASer genes on the *B. thetaiotaomicron* chromosome.  
551 Because no identical or similar attachment DNA sequences were found in *P. copri*, we so far  
552 carried out the complementation by the same allelic exchange approach as used for gene  
553 deletion. Thus, development of a similar integration vector for *P. copri* or a *P. copri* parent strain  
554 carrying attachment sites for pNBU2, has the potential to simplify the process of genetic  
555 complementation.

556 The high prevalence and increased abundance of *P. copri* in the intestinal microbiota is frequently  
557 associated with consumption of fiber-rich diets, which has inspired the research for underlying  
558 genetic basis of polysaccharide utilization in *P. copri*. Combinations of comparative genomics and  
559 phenotypic assays have predicted the substrates for the PULs harboring well-defined CAZymes-  
560 coding genes (Fehlner-Peach et al., 2019). However, the direct contribution of specific PULs for  
561 polysaccharide substrates has not been documented for *P. copri*. Our genetic studies confirmed  
562 the previous bioinformatic prediction of arabinan as the substrate for the PUL14 homologs  
563 (Fehlner-Peach et al., 2019). Additionally, three new PUL/polysaccharide combinations were  
564 identified in *P. copri*. It is intriguing that PUL24, whose homologous gene cluster was predicted  
565 based on bioinformatic analysis as xylan-processing PUL, was identified in this study to be  
566 essential for wheat arabinoxylan utilization, but non-essential for xylan utilization. Thus, genetic  
567 approaches coupled with phenotypic and transcriptome analyses present a framework for a more

568 accurate characterization of PULs. Notably, the gene organization and content of PULs varied  
569 between *P. copri* strains from conserved to variable. For instance, the strictly conserved synteny  
570 of the arabinan and arabinoxylan processing PULs suggests that they have been under the  
571 positive selection pressure, as discussed below. In contrast, the gene content of the PULs for  
572 pectic galactan and inulin are relatively variable, suggesting the non-essentiality of certain genes  
573 for supporting growth of *P. copri* on these two carbon sources, including even *susC/D*-like genes.  
574 These observations support the model that *susC/D*-like element in some but not all PULs are  
575 essential for the uptake of polysaccharides and are therefore suboptimal markers for  
576 carbohydrate utilization potential. Finally, *P. copri* strain carry either one of two types of PUL<sup>Ara</sup>,  
577 i.e. type-I with a single *susC/D* pair or type-II PUL<sup>Ara</sup> with tandem repeat *susC/D*, which appears  
578 to be shared phenomenon in the *Bacteroides*, *Phocaeicola* and *Prevotella* genera. In *P. copri*,  
579 the distribution of the two distinct PUL types showed largely clade-specific features, i.e. clade A  
580 encoded both types of PUL<sup>Ara</sup>, clades C and D only encoded type-I, and none of identified PUL<sup>Ara</sup>  
581 was found in clade B (Fehlner-Peach et al., 2019; Tett et al., 2019). While the HTCS regulators  
582 independent of the PUL<sup>Ara</sup> type shared high homology between members of the same clade, the  
583 *susC/D*-like and SGBP-like genes clustered by PUL type. Notably, PUL<sup>Ara</sup> type-specific  
584 domination was observed in individuals consuming a vegan diet, suggesting the advantage of  
585 type-II over type-I in utilizing arabinan or potential other arabinose-based polysaccharides from  
586 dietary fibers in the human gut.

587 In summary, we have demonstrated the versatile capacities of the genetic toolbox for, firstly,  
588 generating a series of individual gene insertion mutants for phenotypic screening in parallel;  
589 secondly, enabling targeted gene deletion and complementation to establish causal relationship  
590 between genotypes and phenotypes; thirdly determining the impact of homologous genes in  
591 distinct *P. copri* strains on specific polysaccharide utilization. The toolbox will enable the  
592 dissection of more sophisticated biological interactions of *P. copri* with the human hosts during  
593 health and disease, such as investigate associations of *P. copri* to host metabolism *in vivo*  
594 (Kovatcheva-Datchary et al., 2015; Pedersen et al., 2016; De Vadder et al., 2016). Importantly,  
595 the platform was designed using general principles highlighting key technical details that can be  
596 modified and applied to other *Prevotella* species and even prominent bacterial genera from  
597 humans and other habitats. Moreover, these principles can be utilized for further development of  
598 high throughput genetic screening, such as transposon mutagenesis (Goodman et al., 2011) and  
599 CRISPRi (Peters et al., 2016), thereby advancing studies into systematically understanding the  
600 ecological and metabolic processes of microbiota and their impacts on host health and disease.

601

602 **Figure legends**

603 **Figure 1. Development of a conjugation-based gene insertion platform for *P. copri* strains**  
604 **from multiple clades**

605 (A) Phylogenetic tree of *P. copri* species complex using reference strains (n=17) from four *P.*  
606 *copri* clades (Tett et al., 2019) and novel isolates (n=11) used in this study. *P. copri* clades are  
607 indicated by different colors.

608 (B) Schematic illustration for targeted gene insertion system in *P. copri*. Primer binding sites (P1-  
609 P6) are indicated.

610 (C) Detection of plasmid integration in *P. copri* DSM 18205 and HDD04 by PCR.

611 (D-H) Optimization of conjugation efficacy: Influence on yield of transconjugants of promoter  
612 sequences of selection marker (D), length of homology arm (E), donor *E. coli* strain (F),  
613 conjugation ratio of donor to recipient strains (G), recipient *P. copri* strains that are erythromycin-  
614 sensitive (H) or tetracycline-sensitive (I). Comparisons in (D-G) were performed using *P. copri*  
615 HDD04.

616 Values and error bars represent the mean of at least three biological replicates and their standard  
617 deviations (SDs), respectively. Statistical significance between groups was calculated by  
618 Student's *t* test (\* $p < 0.05$ ; \*\* $p < 0.01$ ; \*\*\* $p < 0.001$ ; and \*\*\*\* $p < 0.0001$ ; NS,  $p > 0.05$ , not statically  
619 significant; ND, not detectable)

620

621

**Figure 1**

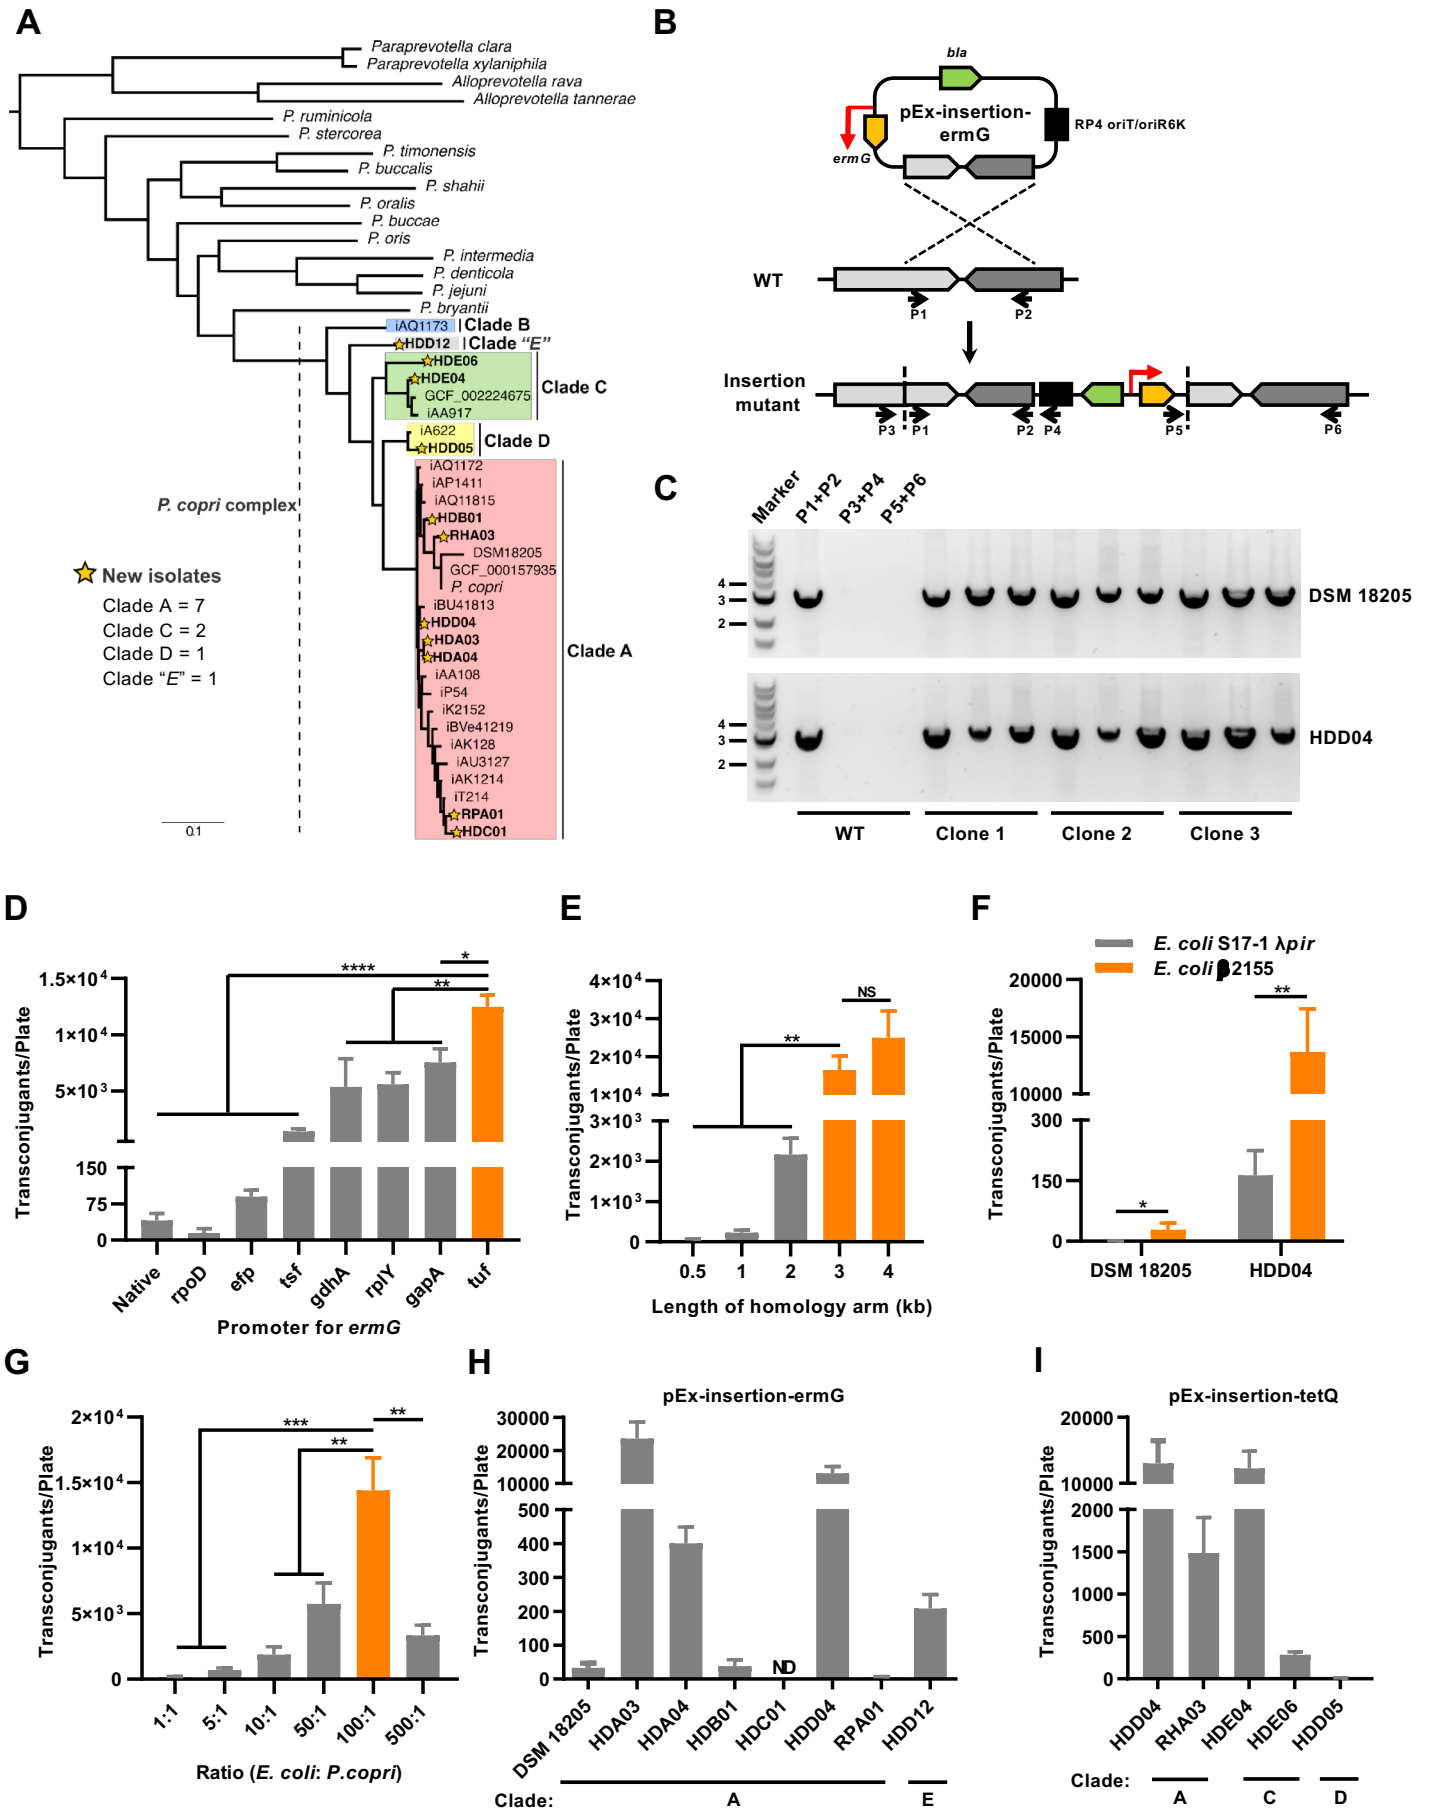

622 **Figure 2. Identification of HTCS and associated PULs essential for utilization of**  
623 **polysaccharides using targeted gene inactivation**

624 (A) Schematic illustration for gene inactivation strategy targeting HTCS gene candidates in *P.*  
625 *copri* HDD04.

626 (B) Growth of *P. copri* HDD04 strains with plasmid insertions at an intergenic region (control) and  
627 two representative putative HTCS genes, respectively, in minimal media (MM) supplemented with  
628 glucose or indicated polysaccharides.

629 (C) Growth of *P. copri* HDD04 strains with respective *htcs*-PUL14, -PUL24, and -PUL24 insertion  
630 compared to an intergenic insertion mutant on arabinan, pectic galactan, and arabinoxylan,  
631 respectively.

632 (D) Maximum growth (OD<sub>600</sub> max) of mutant strains (n=11) in MM supplemented with glucose or  
633 indicated polysaccharides.

634 Error bars represent the standard error of the means (SEMs) in (B) and SDs in (C) and (D) of the  
635 biological replicates from three carbohydrate arrays with each carbohydrate tested in duplicate,  
636 respectively.

637

638

**Figure 2**

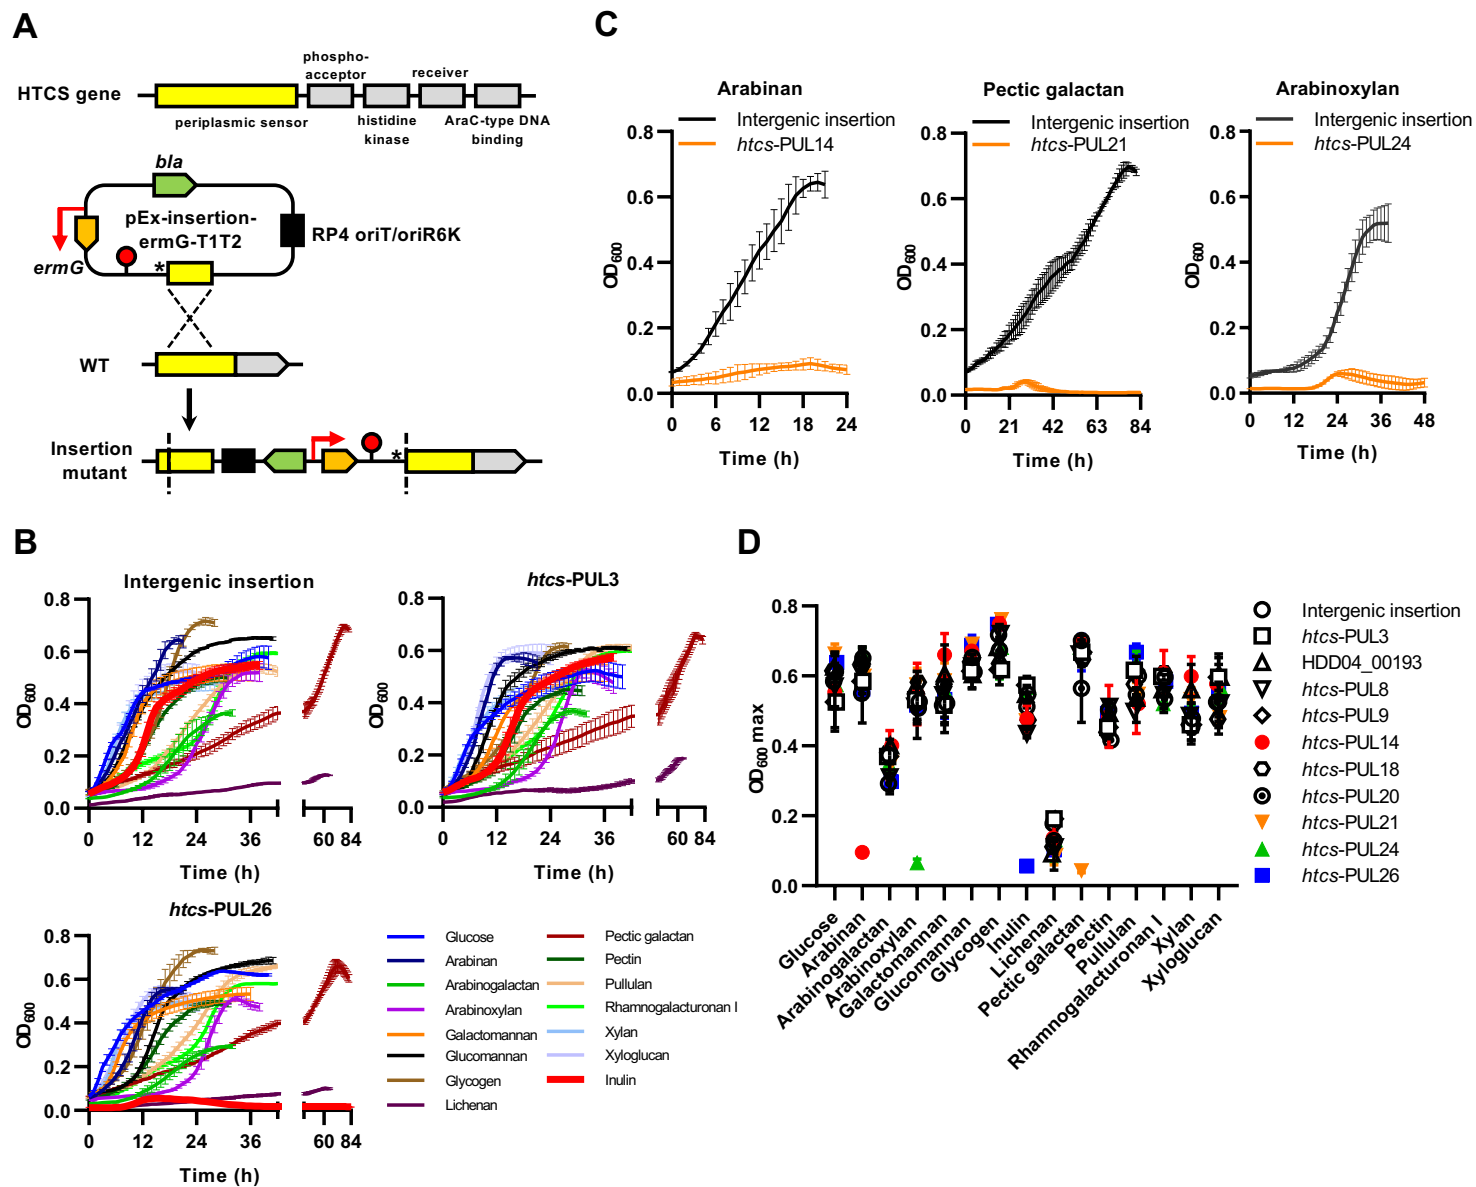

639 **Figure 3. Development of a conjugation-based gene deletion and complementation**  
640 **platform for *P. copri* strains**

641 (A) Schematic illustration for allelic exchange using pEx-deletion-ermG.

642 (B) Viability of *P. copri* HDD04 with integration of pEx-insertion-ermG or pEx-deletion-ermG into  
643 the chromosome on YT agar plates with indicated supplements. Error bars represent the mean  
644 of three biological replicates  $\pm$  SDs (\*\* $p < 0.001$ ).

645

646 (C and D) Generation of *P. copri* HDD04  $\Delta htcs^{Ara}$  and  $\Delta htcs^{Inu}$  and quantification of growth.  
647 Detection of deletion and complementation of two HTCS genes in *P. copri* HDD04 by PCR using  
648 “OUT” and “IN” primer pairs (C) and growth of indicated strains in arabinan or inulin (D),  
649 respectively.

650 (E) Growth of the wild-type and  $htcs^{Inu}$  mutant strains of DSM 18205 and HDB01, respectively.

651 In (B, D, and E), the data represent the means of three biological replicates  $\pm$  SDs.

652

**Figure 3**

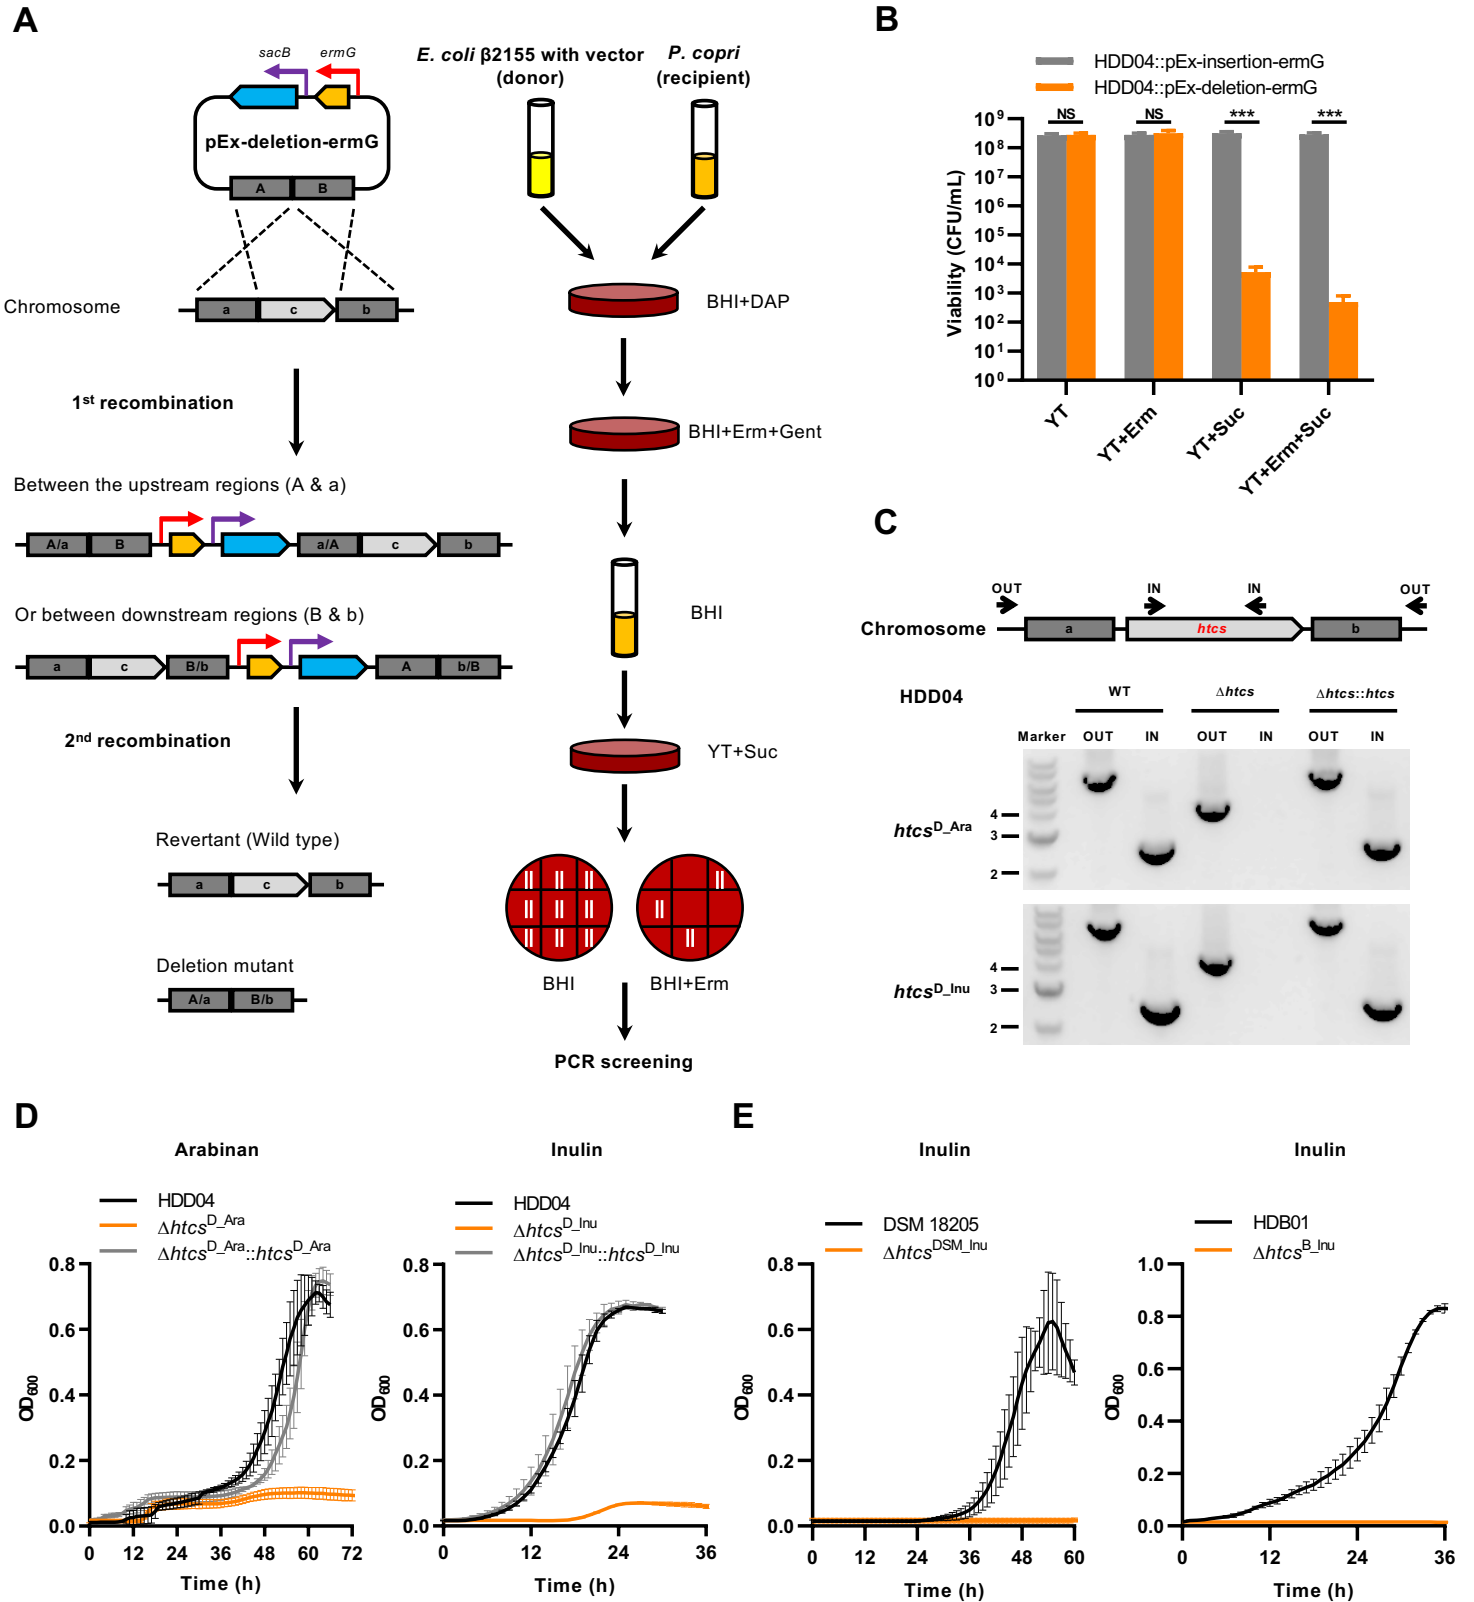



653 **Figure 4. Transcriptional adaptation of *P. copri* HDD04 to distinct plant polysaccharides**  
654 **and in the human gut.**

655 (A) Heatmap showing the induction of *susC* and *susD* homologs in each predicted PUL from *P.*  
656 *copri* HDD04 in MM supplemented with indicated polysaccharides or in a fecal sample. Average  
657 gene expression of every *susC/D* element (two or four genes) was calculated and normalized to  
658 expression in glucose. The heatmap shows the average log<sub>2</sub> fold change of *susC/D* pairs within  
659 the predicted PULs. PUL14 (PUL<sup>D\_Ara</sup>), PUL21 (PUL<sup>D\_PecGal</sup>), PUL24 (PUL<sup>D\_AraXyl</sup>), and PUL26  
660 (PUL<sup>D\_Inu</sup>) are highlighted by black borders.

661 (B) Genetic architectures of PUL<sup>D\_Ara</sup>, PUL<sup>D\_PecGal</sup>, PUL<sup>D\_AraXyl</sup>, and PUL<sup>D\_Inu</sup>, in *P. copri* HDD04.  
662 Genes in PULs are annotated by their gene numbers and predicted functions. .

663 (C) *In vitro* transcriptional response of targeted *susC* homologs in MM+indicated polysaccharide  
664 in comparison with MM+Glucose reference.

665

666

667

668

Figure 4

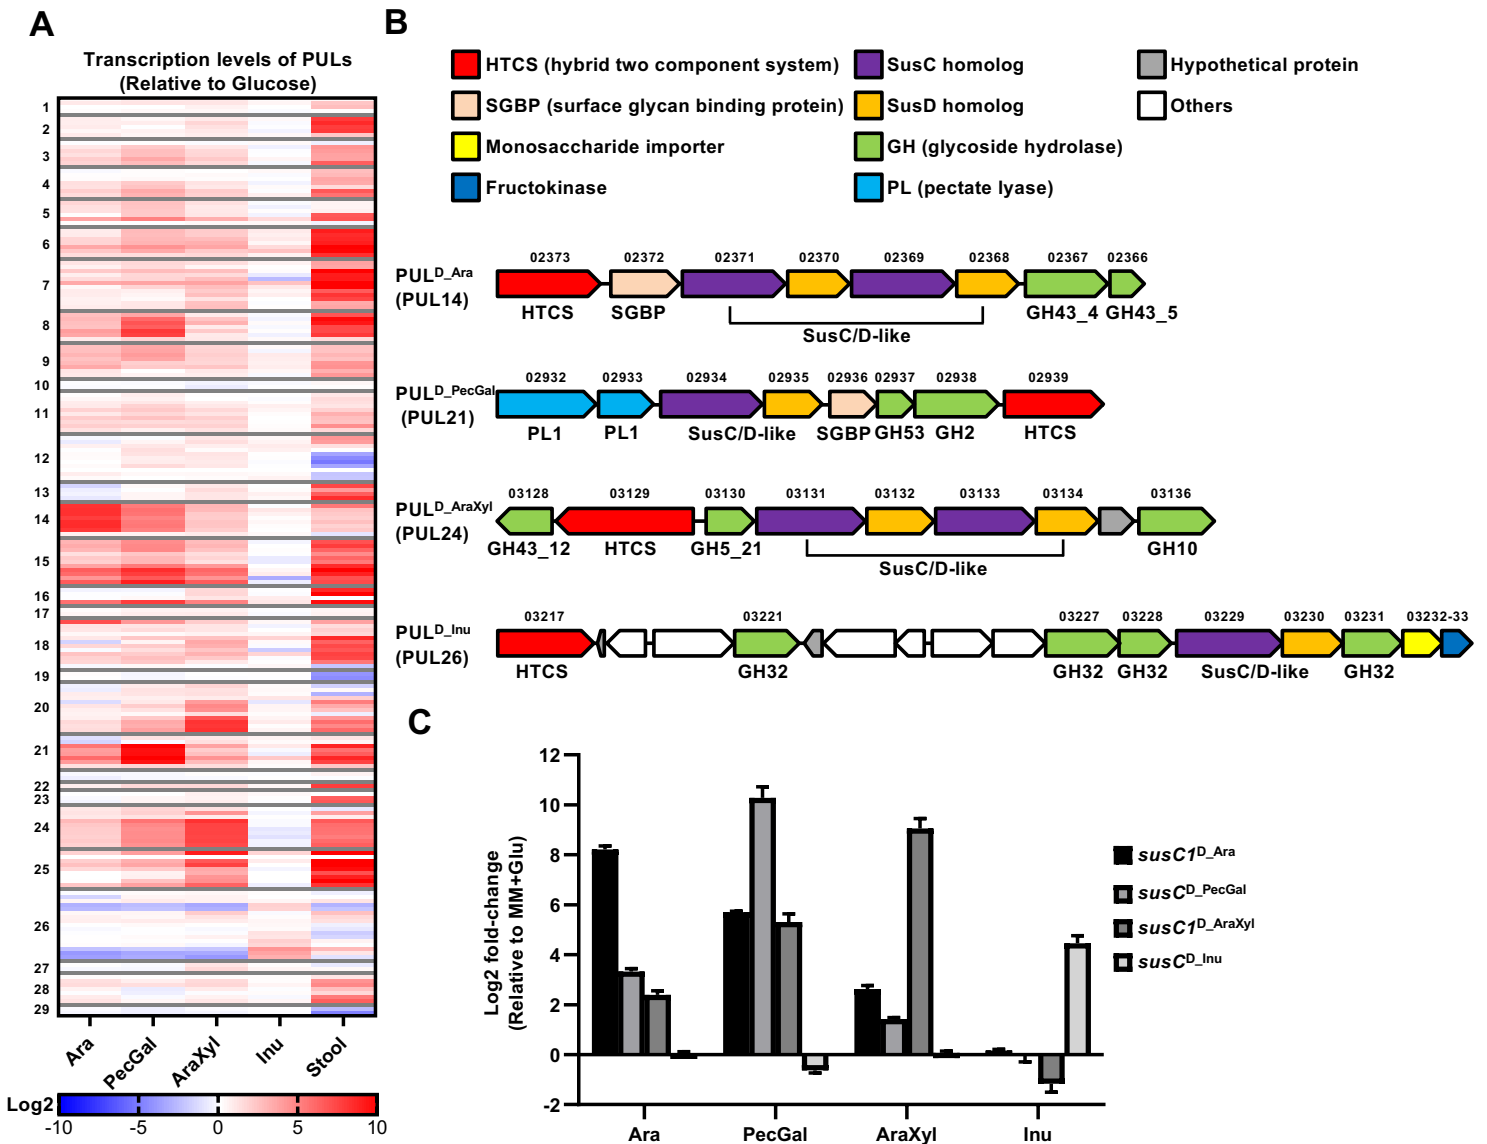

669 **Figure 5. Genetic and phylogenetic analyses of PUL<sup>Ara</sup> types in members of the genera**  
670 ***Prevotella*, *Phocaicola* and *Bacteroides*.**

671 (A) Phylogenetic trees of HTCS and SusC-like proteins encoded by two types of arabinan  
672 processing PULs in diverse *P. copri* strains, *B. thetaiotaomicron* VPI-5482, and *P. vulgatus* ATCC  
673 8482. The isolates from distinct *P. copri* clades are indicated by dots in different colors. The  
674 proteins from type-II PUL<sup>Ara</sup> are highlighted in bold.

675 (B) Growth of *P. copri* DSM 18205 and HDD04 wild-type strains and indicated mutants in  
676 MM+Arabinan.

677 (C) Distribution of two types of arabinan processing PULs in the members of genera *Prevotella*,  
678 *Bacteroides* and *Phocaeicola*. Total number of genomes for each clade or species group that  
679 were analyzed is indicated above the bars.

680 (D) The association between the two types of PUL<sup>Ara</sup> in *P. copri* and host dietary preference. The  
681 relative abundance of identified *P. copri* MAGs for each individual was grouped based on the  
682 presence or absence of two types of PUL<sup>Ara</sup> in each dietary habit. Asterisks indicate Wilcoxon U-  
683 test significant differences (\*p < 0.05; NS, p > 0.05, not statically significant)

684 **Table 1. Gene organizations of two types of arabinan processing PULs in multiple *P. copri***  
685 **and two *Bacteroides* type strains with the capacities of growing on arabinan.**

686

687

**Figure 5**

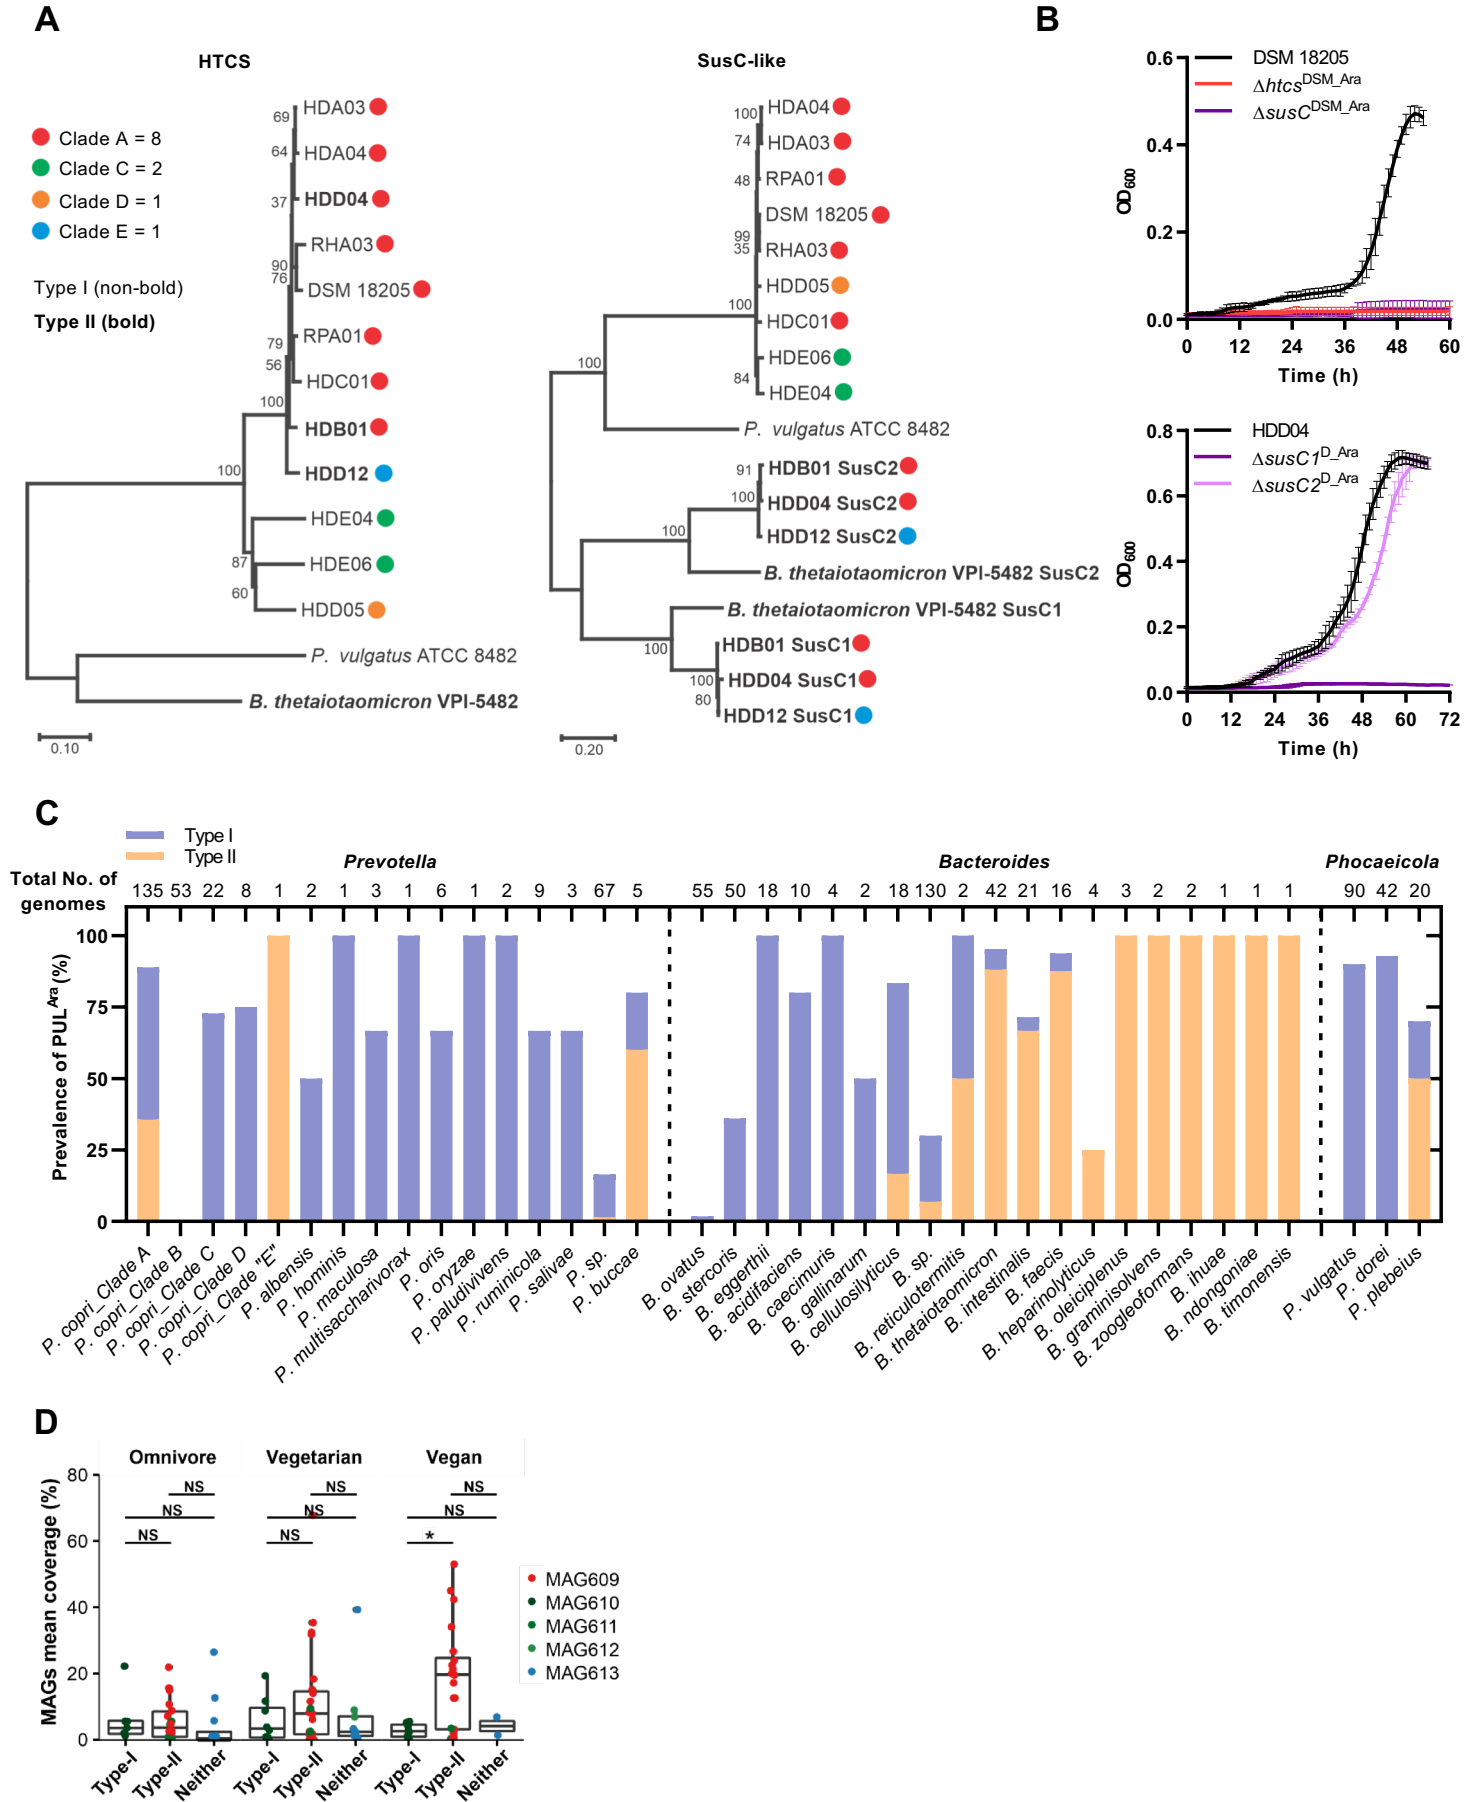

Table 1

A

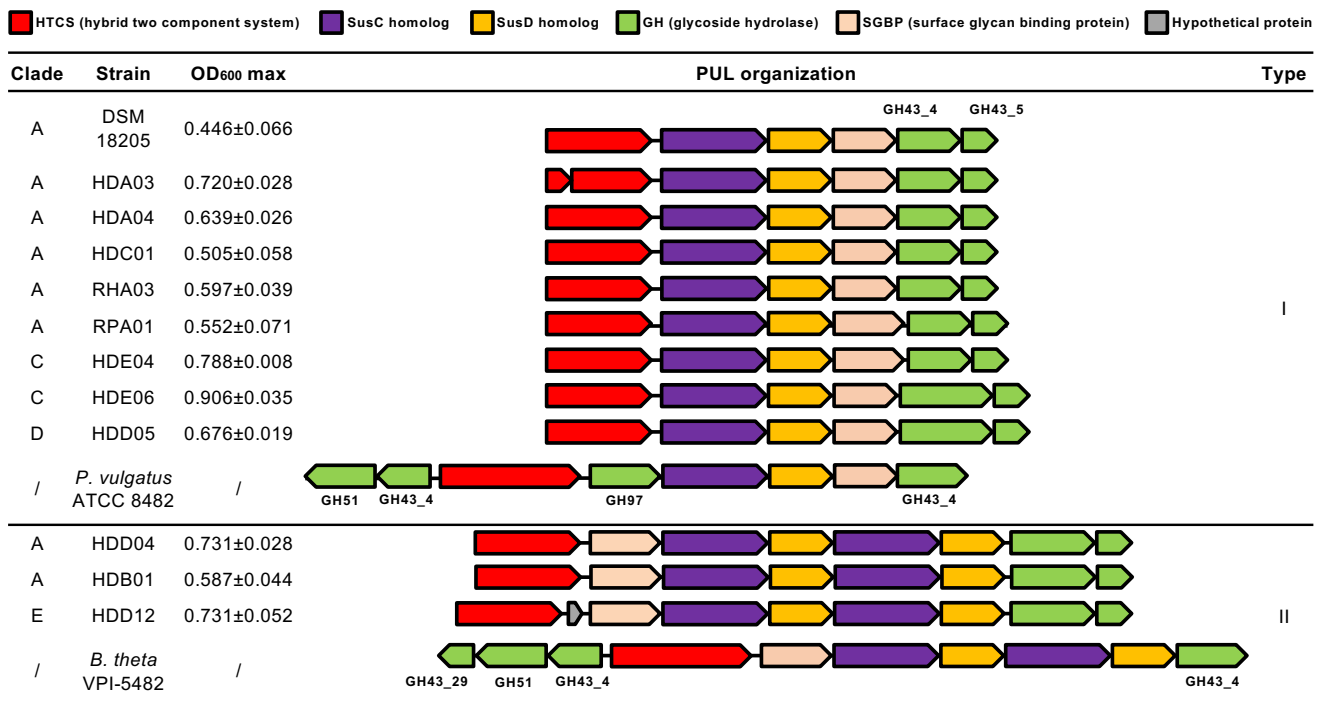

688 **STAR METHODS**

689 **RESOURCE AVAILABILITY**

690 **Lead Contact**

691 Further information and requests for resources and reagents should be directed to and will be  
692 fulfilled by the Lead Contact, Till Strowig ([Till.Strowig@helmholtz-hzi.de](mailto:Till.Strowig@helmholtz-hzi.de)).

693 **Materials Availability**

694 **KEY RESOURCES TABLE**

695

696 **Preparation of culture media for *Prevotella copri***

697 **BHI+S liquid medium**

698 The fetal bovine serum was heated at 56°C for 30 min to inactivate complement. 9.25 g of brain  
699 heart infusion (BHI) powder was dissolved in 225 mL double-distilled water (ddH<sub>2</sub>O) in 500-mL  
700 glass bottle. The medium was supplemented with 10% fetal bovine serum (FBS), and placed on  
701 the hotplate stirrer with 250°C for 20 min. The heated medium was then cooled down to room  
702 temperature, supplemented with 1 µg/mL vitamin K3, and filter-sterilized using a filter unit (0.22  
703 mm pore diameter).

704 **Minimal medium**

705 Minimal medium (MM) was prepared as previously described with some modifications (Martens  
706 et al., 2008). It contained 100 mM KH<sub>2</sub>PO<sub>4</sub> (pH 7.2), 15 mM NaCl, 8.5 mM (NH<sub>4</sub>)<sub>2</sub>SO<sub>4</sub>, 10 mL/L  
707 amino acid mix solution (250 mg each of L-alanine, L-arginine, L-asparagine, L-aspartic acid, L-  
708 cysteine, L-glutamic acid, L-glutamine, glycine, L-histidine, L-isoleucine, L-leucine, L-methionine,  
709 L-phenylalanine, L-proline, L-serine, L-threonine, L-tryptophan, L-tyrosine, L-valine, and 312 mg  
710 of L-lysine monohydrochloride into 1 L ddH<sub>2</sub>O), 10 mL/L purine/pyrimidine solution (200 mg each  
711 of adenine, guanine, thymine, cytosine, and uracil into 1 L ddH<sub>2</sub>O, pH 7.0), 10 mL/L ATCC Vitamin  
712 Mix, 10 mL/L ATCC Trace Mineral Mix, 100 µM MgCl<sub>2</sub>, 1.4 µM FeSO<sub>4</sub>·7H<sub>2</sub>O, 50 µM CaCl<sub>2</sub>, 1.9  
713 µM hematin, 1 mg/L vitamin K3, 5 µg/L vitamin B12, 1 µL/L vitamin K1 solution, and 0.5 g/L  
714 cysteine. The commercial carbohydrates were prepared as described previously (Martens et al.,  
715 2011). Briefly, 10 g/L carbohydrate stock solutions (2× concentration) were sterilized by

716 autoclaving at 121°C for 15 mins. When needed, 10 g/L carbohydrate solutions were added into  
717 2× MM at a volume ratio of 1: 1.

### 718 **YT+S agar**

719 Sucrose was dissolved in ddH<sub>2</sub>O at 0.5 g/mL (50%) as a stock solution. 5 g yeast extract and 10  
720 g tryptone were dissolved in 900 mL ddH<sub>2</sub>O. The resulting medium (YT) was autoclaved, cooled  
721 down to 50°C, and supplemented with 5% sucrose (100 mL 50% sucrose stock solution) for  
722 counter-selection for gene deletion and complementation of *Prevotella copri* strains. When  
723 necessary, the different volumes of sucrose solution were added in media.

724

### 725 **Bacterial culture conditions**

726 All strains, plasmids, and primers used are listed in Table S1. *Escherichia coli* strains were grown  
727 aerobically at 37°C on Luria-Bertani (LB) media. *E. coli* β2155 were specially cultured on LB  
728 supplemented with 0.3 mM 2,6-Diaminopimelic acid (DAP) (Demarre et al., 2005). *P. copri* was  
729 cultured in BHI+S liquid media, minimal media plus a carbon source, on BHI agar supplemented  
730 with 5% defibrinated horse blood or on YT agar supplemented with 5% defibrinated horse blood  
731 and 5% sucrose unless otherwise specified. Cultures were routinely grown and manipulated in an  
732 anaerobic chamber (Coy Laboratory Products) with an atmosphere of 20% CO<sub>2</sub>, 10% H<sub>2</sub>, and  
733 70% N<sub>2</sub> at 37°C. When necessary, antibiotics were added to the medium as follows: 7 µg/mL  
734 vancomycin, 100 µg/mL ampicillin, 200 µg/mL gentamicin, 20 µg/mL erythromycin for selecting  
735 *P. copri* DSM 18205 derived plasmid integrants; 5 µg/mL for other *P. copri* strains, and 20 µg/mL  
736 tetracycline for RHA03 and HDE06; 2.5 µg/mL for HDD04, HDE04 and HDD05.

737

### 738 **Isolation of *P. copri* from humans**

739 *P. copri* was isolated from fecal samples of *P. copri*-positive donors previously determined by 16S  
740 rRNA sequencing. Briefly, the fresh fecal samples were collected and further processed in an  
741 anaerobic chamber. A pea-sized fecal pellet was resuspended in 5 mL BHI+S and filtered through  
742 70 µm cell strainer. We performed a serial ten-fold dilution of the flow-through, and streaked out  
743 the diluted samples with the dilution factors of 10<sup>-3</sup> to 10<sup>-6</sup> on BHI blood agar plates supplemented  
744 with vancomycin. The plates were then incubated anaerobically at 37°C for 48-72 hr. Individual  
745 colonies were picked into BHI+S broth and the resulting cultures were screened by PCR for *P.*  
746 *copri*-positive cultures using *P. copri*-specific primers (P\_copri\_69F/P\_copri\_853R). The pure *P.*

747 *copri* isolates were obtained by streaking out the *P. copri*-positive cultures above, and confirmed  
748 by Sanger sequencing using the 16S rRNA gene-specific primers as described previously  
749 (16S\_27F/16S\_1492R) (Miller et al., 2013). The fresh culture of *P. copri* was mixed with an equal  
750 volume of 50% glycerol in BHI medium in sealed glass vials as bacterial glycerol stocks, and  
751 cryopreserved at -80°C immediately.

752

### 753 **DNA extraction from human feces and *P. copri* cultures**

754 The DNA extraction from fecal samples of *P. copri*-positive donors or *P. copri* strains cultured in  
755 BHI+S broth (OD<sub>600</sub>=0.6) was performed using ZymoBIOMICS DNA Miniprep Kit based on the  
756 instruction manual. We measured the concentration of purified DNA samples by Qubit  
757 Fluorometer (Thermo Scientific), and analyzed by agarose gel electrophoresis, NanoDrop™ 2000  
758 (Thermo Scientific), and Bioanalyzer (Agilent Technologies).

759

### 760 **Whole genome sequencing, assembly, and annotation**

761 The DNA library for genome sequencing of *P. copri* strains was performed using NEBNext®  
762 Ultra™ II FS DNA Library Prep Kit (New England Biolabs) for Illumina with parameters as  
763 followed: 500 ng input DNA and 5 min at 37°C for fragmentation; > 550-bp DNA fragments for  
764 size selection; primers from NEBNext Multiplex Oligos for Illumina Kit (New England Biolabs) for  
765 barcoding. The library was sequenced on the Illumina Miseq 2×250 bp. The obtained reads were  
766 thus assembled with SPAdes version v3.10.0 using “careful” mode (Bankevich et al., 2012). Short  
767 contigs were then filtered by length and coverage (contigs > 500 bp and coverage > 5×). Gene  
768 prediction and annotation was performed using PROKKA version v1.13.3 (Seemann, 2014) with  
769 default parameters.

770

### 771 **Phylogenetic analyses**

772 Placement of *P. copri* complex. The phylogenomic analyses were conducted as previously  
773 described on the characterization of the *P. copri* Complex (Tett et al., 2019) using PhyloPhlAn3  
774 (Asnicar et al., 2020) with reference set of *P. copri* strains (Tett et al., 2019) and the newly *P.*  
775 *copri* strains isolated in this study. The phylogenetic analysis in Figure 1A was built using the  
776 400 universal marker genes of the PhyloPhlAn database using the parameters “--diversity low”,



777 and "--accurate" option. The configuration file (config\_file.cfg) was set with the following tools  
778 and parameters:

779 Diamond version v0.9.9.110 (Buchfink et al., 2015) with "Blastx" for the nucleotide-based  
780 mapping, "Blastp" for the amino-acid based mapping, and "--more-sensitive --id 50 --max-hsps 35  
781 -k 0" in both cases. MAFFT version v7.310 (Kato and Standley, 2013), with "--localpair --  
782 maxiterate 1000 --anysymbol --auto" options. trimAl version 1.2rev59 (Capella-Gutiérrez et al.,  
783 2009), with "-gappyout" option. IQ-TREE multicore version v1.6.9 (Nguyen et al., 2015), with "-nt  
784 AUTO -m LG" options. RAxML version 8.1.15 (Stamatakis, 2014), with "-p 1989 -m GTRCAT -t"  
785 options.

786 For Figure 5 and S6, the amino acid sequences of HTCS, SusC-like, SusD-like, and SGBP-like  
787 proteins encoded by arabinan processing PULs (PUL<sup>Ara</sup>) from *Bacteroides thetaiotaomicron* VPI-  
788 5482, *Phocaeicola vulgatus* ATCC 8482 and 12 *P. copri* strains were used for the phylogenetic  
789 trees via the MEGA-X software, respectively. The evolutionary history was inferred using the  
790 Neighbor-Joining method (Saitou and Nei, 1987) with 1000 bootstrap replicates. The two types of  
791 PUL<sup>Ara</sup> extracted from all recovered assemblies from the genus *Prevotella* (n=8), *Bacteroides*  
792 (n=13) and *Phocaeicola* (n=3) was calculated for the analysis of phylogenetic distributions,  
793 respectively.

794

#### 795 **Determination of *P. copri* sensitivity to oxygen**

796 *B. thetaiotaomicron* VPI-5482, *P. copri* HDD04, HDB01, and DSM 18205 were grown in BHI+S  
797 broth anaerobically. The fresh bacterial cultures were divided into 1 mL aliquots into 2 mL tubes  
798 with the caps being open, respectively. These aliquots were aerobically incubated at 37°C. At four  
799 time points (0, 1, 2, 4 hrs), three aliquots from respective cultures were placed back to the  
800 anaerobic chamber and performed serial dilutions for counting CFUs.

801

#### 802 **Determination of *P. copri* sensitivity to antibiotics**

803 The wells of a non-tissue culture flat bottom 96-well were loaded with 198 µl BHI+S media in the  
804 presence of 2-fold serial dilutions of erythromycin, tetracycline, chloramphenicol, spectinomycin,  
805 apramycin, and hygromycin ranging from 0.04 to 400 µg/mL. BHI+S media without antibiotics was  
806 loaded as a positive control. *P. copri* strains were grown in BHI+S broth to an optical density  
807 (OD<sub>600</sub>) of 0.5-0.7. 2 µL bacterial culture was then inoculated into each well (inoculation ratio of

808 1:100). Absorbance at OD<sub>600</sub> of each well was measured at an interval of 1 hr for 5 days using  
809 the microplate reader (BioTek). Assays were performed in triplicate. To ensure that the  
810 concentrations of erythromycin and tetracycline used for selecting transconjugants of different *P.*  
811 *copri* strains were sufficient for killing all the wild-type *P. copri* cells, 1 mL of fresh *P. copri* culture  
812 ( $10^8$ - $10^9$  bacterial cells) was plated on the BHI blood agar with respective concentration of  
813 antibiotics in triplicate.

814

#### 815 **Prediction of HTCS genes in *P. copri***

816 The genes of *P. copri* HDD04 that encodes proteins containing all the domains of HTCS  
817 (PF07494-PF07495-PF00512-PF02518-PF00072-PF12833) according to the Pfam classification  
818 were identified as described previously (Terrapon et al., 2015). The hmmsearch was carried out  
819 using default parameters (Eddy, 1998)

820

#### 821 **Molecular cloning**

822 The relevant primers and plasmids are described in Tables S1. PCR amplification for cloning was  
823 carried out using Q5 High Fidelity DNA Polymerase (New England Biolabs). The PCR products  
824 were purified, and followed by DNA assembling with PCR amplified plasmid using Gibson reaction  
825 (HiFi DNA Assembly Master Mix, New England Biolabs). The assembled products were  
826 transformed into *E. coli*  $\beta$ 2155 by chemical transformation. The resulting colonies were randomly  
827 picked to detect the inserts and their sizes by colony PCR using OneTaq DNA Polymerase (New  
828 England Biolabs). Genetic modifications generated on plasmids were verified by sequencing at  
829 Microsynth Seqlab (Microsynth AG, Germany).

830 Specifically, the pEx-insertion vector was constructed as follows: Firstly, the thymidine kinase  
831 gene (*tdk*) and its promoter was deleted from the multiple cloning site using DNA assembling with  
832 PCR amplified plasmid, resulting in pExchange. Secondly, 300-bp of the *tuf* (elongation factor Tu,  
833 DSM18205\_02600) promoter was inserted into pExchange exactly before the coding sequence  
834 of *ermG*, generating the pEx-insertion-*ermG* vector. For first trial of genetic insertion in *P. copri*,  
835 3-kb DNA sequences from DSM18205\_00642-43, 00941-42, and 02334-35 were cloned into the  
836 multiple cloning site of pEx-insertion-*ermG* as the homology arm for plasmid integration. The pEx-  
837 insertion-*ermG* with the DNA region from DSM\_02334-35 (DSM\_02334: putative  $\beta$ -glycoside  
838 hydrolase, *bgl*) was designated as pEx-insertion-*ermG*-DSM-*bgl*.

839 Based on pEx-insertion-ermG as the vector backbone, similar cloning procedures were performed  
840 for constructing various plasmids carrying: (1) different promoter sequences for driving selective  
841 marker; (2) different sizes of homology arms varying from 0.5-kb to 4-kb for integration in *P. copri*  
842 HDD04; (3) 3-kb cloned homologous regions from different *P. copri* strains in our collection; (4) a  
843 pLGB30-derived *tetQ* selective marker (García-Bayona and Comstock, 2019) instead of *ermG*;  
844 (5) the T1-T2 terminators copied from pSAM (Goodman et al., 2011) for blocking the  
845 transcriptional readthrough for the HTCS genes after plasmid integration.

846 The pEx-deletion-ermG and pEx-deletion-tetQ vectors were created by inserting the counter-  
847 selection marker following *ermG* and *tetQ*, respectively. The counter-selection marker is a DNA  
848 fragment generated by splicing 300-bp of the *gdhA* (HDD04\_01507) promoter and the *sacB* gene  
849 from the pEX18Ap plasmid (Hoang et al., 1998). The pEx-deletion-ermG-bgl was similarly  
850 generated as described above. For in-frame deletion of genes in *P. copri*, the approximately 2-kb  
851 regions flanking the target gene were amplified, and assembled with PCR amplified pEx-deletion-  
852 ermG. For gene complementation, the target gene flanking with approximately 1-kb up- and down-  
853 stream regions were entirely amplified, and cloned into pEx-deletion-ermG.

854

### 855 **Genetic manipulations of *P. copri***

856 Overnight culture of the *E. coli* donor strain was subcultured into LB medium containing ampicillin  
857 and DAP and *P. copri* subcultured into BHI+S medium. When they were grown to exponential  
858 phase ( $OD_{600}=0.5-0.7$ ), *E. coli* culture was transferred into the anaerobic chamber. The following  
859 procedures of genetic manipulations for *P. copri* including plasmid insertion, in-frame deletion,  
860 and complementation were performed in the anaerobic chamber. For conjugation, 1 mL *E. coli*  
861 culture ( $\sim 5 \times 10^9$  CFUs) was centrifuged at  $8000 \times g$  for 3 min to pellet the bacterial cells, followed  
862 by resuspension in 100  $\mu$ L fresh *P. copri* culture ( $\sim 5 \times 10^7$  CFUs) to get a ratio of donor: recipient  
863 of 100: 1. Specially, if *P. copri* HDA04 or HDD12 culture was used as the recipient strain for  
864 conjugation, to obtain the same donor/recipient ratio above, 20  $\mu$ L HDA04 culture plus 80  $\mu$ L  
865 BHI+S medium or 10  $\mu$ L HDD12 culture plus 90  $\mu$ L BHI+S medium was used to resuspend the *E.*  
866 *coli* pellet, respectively. The resuspension was then plated on a BHI blood agar with DAP for 18  
867 hrs at 37°C for bacterial conjugation unless otherwise stated. Bacterial cells were washed off from  
868 the plate using 1 mL BHI+S medium, mixed well, and plated serial dilutions or the whole bacterial  
869 pellet after centrifugation on BHI blood agar plates containing gentamicin in addition of  
870 erythromycin or tetracycline. Colonies generated from transconjugants were visible after

871 incubation of plates for 2-4 days according to properties of the *P. copri* derivatives. If necessary,  
872 the CFUs were counted for quantification of transconjugant yields. Insertion of the plasmid was  
873 verified by amplifying two joints between the bacterial chromosome and vector via colony PCR  
874 using P3/P4 and P5/P6 primer pairs, with P1/P2 amplified DNA as a control.

875 For in-frame deletion and complementation, the insertion mutants were grown in liquid BHI+S  
876 without selection, and then subcultured every 12 hr for allelic exchange. The final culture was  
877 plated onto YT agar plates supplemented with 5% sucrose to select the revertants (wild type) and  
878 gene deletion mutants with loss of the vector. After incubation of plates for 2-4 days, individual  
879 colonies were restreaked onto BHI blood plates in the presence and absence of erythromycin  
880 using the same inoculating loop, respectively, to further confirm erythromycin sensitivity of the  
881 clones. Erythromycin-sensitive clones were subsequently screened for the genetic modifications  
882 (gene deletion or complementation) by PCR and verified by sequencing at Microsynth Seqlab  
883 (Germany).

884

#### 885 **Prediction of PULs in *P. copri* genomes**

886 The prediction of PULs in *P. copri* genomes and MAGs was described previously (Gálvez et al.,  
887 2020). Briefly, PULs and *susC/D*-like gene annotations were carried out using PULpy (Stewart et  
888 al., 2018) (commit 8955cdb, <https://github.com/WatsonLab/PULpy>). Annotation of carbohydrate-  
889 active enzymes (CAZymes) surrounding the *susC/susD*-like pairs was performed by using  
890 dbCAN2 tool (Zhang et al., 2018) version v2.0.6 (CAZy-DB=07312019,  
891 [https://github.com/linnabrown/run\\_dbcan](https://github.com/linnabrown/run_dbcan)).

892

#### 893 **Measurement of *P. copri* growth on a carbohydrate array**

894 The growth curves of *P. copri* strains cultured in minimal medium (MM) supplemented with a sole  
895 carbohydrate were measured as previously described with the following modifications (Martens  
896 et al., 2011). The wells of a non-tissue culture flat bottom 96-well were loaded with 100  $\mu$ l sterilized  
897 carbohydrate stocks (2 $\times$  concentration). Each carbohydrate was added into at least three wells.  
898 *P. copri* was grown in MM+Glucose to an OD<sub>600</sub> value of approximately 0.6. 400  $\mu$ L culture was  
899 then centrifuged to pellet the bacterial cells. The pellet was washed by 1 mL 2 $\times$  MM without any  
900 carbohydrates and resuspended in 10 mL 2 $\times$  MM as a seed culture. Each well of the plate was

901 loaded with 100  $\mu$ L seed culture. Absorbance at OD<sub>600</sub> of each well was measured for 5 days by  
902 the microplate reader (BioTek) at 1-hr intervals with 15-second pre-shaking.

903 In Figure 2D, Figure S5, and Table S3, the maximal OD<sub>600</sub> values subtracting the background  
904 reads (OD<sub>600</sub> max) in the curves were identified for calculating means and standard deviations  
905 (SDs). Because we observed that the presence of erythromycin in MM significantly affect the  
906 duration of lag phase, but not the growth pattern of *P. copri*. The growth curves of HTCS gene  
907 insertion mutants and relevant intergenic insertion control were therefore shown starting from the  
908 OD<sub>600</sub> values increased by 10% of the OD<sub>600</sub> max to the OD<sub>600</sub> max in Figure 2B and 2C.

909

### 910 **RNA extraction from human feces and metatranscriptome sequencing**

911 The fecal sample from the human donor carrying *P. copri* HDD04 was immediately collected into  
912 DNA/RNA Shield Fecal Collections Tubes and stored at 4°C for stabilizing RNA. An aliquot of 400  
913  $\mu$ L content from the tube was used for isolating RNA using ZymoBIOMICS RNA Miniprep Kit  
914 following the instruction manual.

915

### 916 **RNA extraction and RNA-seq library preparation**

917 *P. copri* HDD04 was grown in BHI+S broth to the exponential phase (OD<sub>600</sub>=0.6). 5 mL fresh  
918 cultures were treated by RNeasy Protect (New England Biolabs) based on the manufacturer's  
919 instructions, pelleted by centrifugation, and stored at -80°C until further processing. The bacterial  
920 RNA was isolated using ZymoBIOMICS RNA Miniprep Kit following the instruction manual. RNA  
921 quality was evaluated by agarose gel electrophoresis, NanoDrop™ 2000 (Thermo Scientific), and  
922 Bioanalyzer (Agilent Technologies) according to RNA integrity score (RIN > 8.0). Bacterial  
923 ribosomal RNA (rRNA) was then depleted by Ribo-Zero Gold rRNA Removal Kit (Epidemiology)  
924 as described in the commercial protocol. Libraries for Illumina sequencing were prepared using  
925 the NEBNext® Ultra™ Directional RNA Library Prep Kit for Illumina® (New England Biolabs)  
926 following manufacturer's protocol. For each sample, 100 ng of fragmented mRNA was used as  
927 an input for cDNA synthesis and Illumina sequencing adaptor ligation.

928 For other treatment in Figure 4, *P. copri* HDD04 was initially grown in minimal media plus glucose  
929 (MM+Glucose) to an OD<sub>600</sub> value of 0.5. 2 mL culture was then centrifuged to pellet the bacterial  
930 cells and resuspended using an equal volume of minimal media without carbohydrates (MM),  
931 followed by another centrifugation and resuspending in the same volume of MM. 40  $\mu$ L

932 suspension was inoculated into 4 mL MM plus glucose, arabinan, arabinoxytan, pectic galactan,  
933 and inulin, respectively. Three replicates were performed for each carbon source. Once *P. copri*  
934 grown to OD<sub>600</sub>=0.5, 750 µL culture was taken and treated by RNAprotect (New England Biolabs).  
935 Bacterial ribosomal RNA (rRNA) was thus depleted using Pan-prokaryote riboPOOL™ Kit  
936 (siTOOLs Biotech) as described in the manual. The cDNA library preparation and sequencing  
937 was carried out as described above.

938

### 939 **RNA-seq analysis:**

940 Reads were quality filtered using Trimmomatic (Bolger et al., 2014) version v0.33 with as follow  
941 parameters (LEADING:3 TRAILING:3 SLIDINGWINDOW:4:15 MINLEN:35 HEADCROP:3). After  
942 quality control reads were aligned to each *P. copri* reference genome using STAR (Dobin et al.,  
943 2013) version v2.5.2a. Reads count was performed using HTSeq (Anders et al., 2015) version  
944 v0.11.2. With the aim to control for interspecies multi-mapping, reads were split by mapping to  
945 multiple references using (BBsplit). References genomes were selected from the reconstructed  
946 MAGs and one representative strain for each of the *P. copri* clades in combination with each  
947 donor's isolate from the clade A.

948 For *in vivo* and *in vitro* differential gene expression, gene read counts were transformed using  
949 TPMs normalization and differential gene expression was quantified in R using the DEseq  
950 analysis with a single replicate (iDEG) package (Li et al., 2019).

951 For the transcriptome *in vitro* with supplemented polysaccharides, samples were proceeded as  
952 described above. Normalization and differential expression were quantified in R using the DEseq2  
953 package (Love et al., 2014) version v1.26.0 using the samples grown in MM + glucose as a  
954 control.

955

### 956 **Measurements of gene transcription by RT-qPCR**

957 The preparation of *P. copri* cultures and extraction of total RNA were performed as described  
958 above. Reverse transcription was carried out with ProtoScript® II First Strand cDNA Synthesis Kit  
959 (New England Biolabs) using Random Primer Mix and 800 ng purified RNA as template for 20 µL  
960 reaction. The abundance of transcript for target *susC*-like genes and reference *tuf* gene was  
961 quantified with KAPA SYBR® FAST qPCR mix (KAPA Biosystems) using 0.5 ng/µL template  
962 cDNA, 25 nM of each target gene-specific primer. The reaction was performed in a 96-well plate

963 on the Roche Lightcycler 480. Using the ddCT method, raw values were normalized to values for  
964 the *tuf* gene and then the fold change was calculated by dividing MM+specific polysaccharide  
965 values by values obtained from MM+glucose.

966

## 967 **Reconstruction of *P. copri* MAGs**

968 The reconstruction of *P. copri* MAGs from a recent dataset (De Filippis et al., 2019) was performed  
969 as described previously (Gálvez et al., 2020). In brief, the sequencing data of the gut microbiome  
970 from 101 healthy Italian individuals with distinct diets (Omnivore, n = 25; Vegetarian, n = 39;  
971 Vegan, n = 37; NCBI SRA: SRP126540 and SRP083099) was analyzed as follows: (1) Sample-  
972 wise assembly, annotation, and integrative genomic binning was carried out with ATLAS  
973 metagenomic workflow (Kieser et al., 2020) (commit a007857, [https://github.com/metagenome-  
974 atlas/atlas](https://github.com/metagenome-atlas/atlas)); (2) Genome abundance estimates were calculated for each sample by mapping the  
975 reads to the non-redundant MAGs using BBmap and determining the median coverage across  
976 each of the MAGs.

977

## 978 **QUANTIFICATION AND STATISTICAL ANALYSIS**

### 979 **Statistical Analysis:**

980 Statistical analyses were carried out in R (R Core Team, 2019) and figures were produced using  
981 690 the package ggplot2 (Wickham, 2016). Datasets were analyzed using the GraphPad Prism  
982 8. Pairwise comparisons were performed using Student's *t* test with a paired, two-tailed  
983 distribution. More statistical details are indicated in the associated figure legends when required.

984

## 985 **DATA AND SOFTWARE AVAILABILITY**

986 The accession numbers for all whole genome sequencing and 16S rRNA data reported in this  
987 manuscript are available under NCBI BioProject ID: PRJNA684333.

988 Transcriptome analysis and R customised code is available in [http://github.com/strowig-  
989 lab/galvez\\_et\\_al\\_2020/](http://github.com/strowig-lab/galvez_et_al_2020/).

990

## 991 **ACKNOWLEDGMENTS**

992 We thank members of the Strowig laboratory for valuable discussions. We thank Andrew  
993 Goodman for helpful discussions. We thank the genome analytics core facility of the Helmholtz  
994 Institute for Infection Research. J. L. was funded by Singh-Chhatwal Stipend from Helmholtz  
995 Centre for Infection Research and Humboldt Research Fellowship from Alexander von Humboldt  
996 Foundation.

997

#### 998 **AUTHOR CONTRIBUTIONS**

999 J.L. and T.S. designed the experiments and wrote the paper. J.L. conducted the most of  
1000 experiments and data analysis. L.A. and A.I. performed the strain isolation. J.L., E.J.C.G., and  
1001 T.R.L performed the bioinformatic analysis. L.A. and E.A. assisted in grow assays. L.A. and A.A.B  
1002 assisted in RNA preparation for RNA-seq. E.A. assisted in molecular cloning and genetic  
1003 manipulation.

1004

#### 1005 **DECLARATION OF INTERESTS**

1006 The authors declare no competing interests.

1007

1008



1009 **References**

- 1010 Accetto, T., and Avguštin, G. (2007). Studies on *Prevotella* nuclease using a system for the  
1011 controlled expression of clones genes in *P. bryantii* TC1-1. *Microbiology*.
- 1012 Accetto, T., Peterka, M., and Avguštin, G. (2005). Type II restriction modification systems of  
1013 *Prevotella bryantii* TC1-1 and *Prevotella ruminicola* 23 strains and their effect on the efficiency  
1014 of DNA introduction via electroporation. *FEMS Microbiol. Lett.*
- 1015 Alpizar-Rodriguez, D., Lesker, T.R., Gronow, A., Gilbert, B., Raemy, E., Lamacchia, C., Gabay,  
1016 C., Finckh, A., and Strowig, T. (2019). *Prevotella copri* in individuals at risk for rheumatoid  
1017 arthritis. *Ann. Rheum. Dis.*
- 1018 Anders, S., Pyl, P.T., and Huber, W. (2015). HTSeq-A Python framework to work with high-  
1019 throughput sequencing data. *Bioinformatics*.
- 1020 Arumugam, M., Raes, J., Pelletier, E., Le Paslier, D., Yamada, T., Mende, D.R., Fernandes,  
1021 G.R., Tap, J., Bruls, T., Batto, J.M., et al. (2011). Enterotypes of the human gut microbiome.  
1022 *Nature*.
- 1023 Asnicar, F., Thomas, A.M., Beghini, F., Mengoni, C., Manara, S., Manghi, P., Zhu, Q., Bolzan,  
1024 M., Cumbo, F., May, U., et al. (2020). Precise phylogenetic analysis of microbial isolates and  
1025 genomes from metagenomes using PhyloPhlAn 3.0. *Nat. Commun.*
- 1026 Bäckhed, F., Ley, R.E., Sonnenburg, J.L., Peterson, D.A., and Gordon, J.I. (2005). Host-  
1027 bacterial mutualism in the human intestine. *Science* (80- ).
- 1028 Bencivenga-Barry, N.A., Lim, B., Herrera, C.M., Stephen Trent, M., and Goodman, A.L. (2020).  
1029 Genetic manipulation of wild human gut bacteroides. *J. Bacteriol.*
- 1030 Blomfield, I.C., Vaughn, V., Rest, R.F., and Eisenstein, B.I. (1991). Allelic exchange in  
1031 *Escherichia coli* using the *Bacillus subtilis* *sacB* gene and a temperature-sensitive pSC101  
1032 replicon. *Mol. Microbiol.*
- 1033 Bolger, A.M., Lohse, M., and Usadel, B. (2014). Trimmomatic: A flexible trimmer for Illumina  
1034 sequence data. *Bioinformatics*.
- 1035 Buchfink, B., Xie, C., and Huson, D.H. (2015). Fast and sensitive protein alignment using  
1036 DIAMOND. *Nat. Methods* 12, 59–60.
- 1037 Capella-Gutiérrez, S., Silla-Martínez, J.M., and Gabaldón, T. (2009). trimAl: a tool for automated  
1038 alignment trimming in large-scale phylogenetic analyses. *Bioinformatics* 25, 1972–1973.
- 1039 Cerqueira, F.M., Photenhauer, A.L., Pollet, R.M., Brown, H.A., and Koropatkin, N.M. (2020).  
1040 Starch Digestion by Gut Bacteria: Crowdsourcing for Carbs. *Trends Microbiol.*
- 1041 Chatzidaki-Livanis, M., Geva-Zatorsky, N., Comstock, L.E., and Hooper, L. V. (2016).  
1042 *Bacteroides fragilis* type VI secretion systems use novel effector and immunity proteins to

1043 antagonize human gut Bacteroidales species. Proc. Natl. Acad. Sci. U. S. A.  
1044 Claus, S.P. (2019). The Strange Case of *Prevotella copri*: Dr. Jekyll or Mr. Hyde? Cell Host  
1045 Microbe.  
1046 Costea, P.I., Hildebrand, F., Manimozhian, A., Bäckhed, F., Blaser, M.J., Bushman, F.D., De  
1047 Vos, W.M., Ehrlich, S.D., Fraser, C.M., Hattori, M., et al. (2017). Enterotypes in the landscape of  
1048 gut microbial community composition. Nat. Microbiol.  
1049 D'Elia, J.N., and Salyers, A.A. (1996). Effect of regulatory protein levels on utilization of starch  
1050 by *Bacteroides thetaiotaomicron*. J. Bacteriol.  
1051 Dean, D. (1981). A plasmid cloning vector for the direct selection of strains carrying recombinant  
1052 plasmids. Gene.  
1053 Dehio, C., and Meyer, M. (1997). Maintenance of broad-host-range incompatibility group P and  
1054 group Q plasmids and transposition of Tn5 in *Bartonella henselae* following conjugal plasmid  
1055 transfer from *Escherichia coli*. J. Bacteriol.  
1056 Demarre, G., Guérout, A.M., Matsumoto-Mashimo, C., Rowe-Magnus, D.A., Marlière, P., and  
1057 Mazel, D. (2005). A new family of mobilizable suicide plasmids based on broad host range R388  
1058 plasmid (IncW) and RP4 plasmid (IncP $\alpha$ ) conjugative machineries and their cognate *Escherichia*  
1059 *coli* host strains. Res. Microbiol.  
1060 Dobin, A., Davis, C.A., Schlesinger, F., Drenkow, J., Zaleski, C., Jha, S., Batut, P., Chaisson,  
1061 M., and Gingeras, T.R. (2013). STAR: Ultrafast universal RNA-seq aligner. Bioinformatics.  
1062 Eddy, S.R. (1998). Profile hidden Markov models. Bioinformatics.  
1063 Fehlner-Peach, H., Magnabosco, C., Raghavan, V., Scher, J.U., Tett, A., Cox, L.M., Gottsegen,  
1064 C., Watters, A., Wiltshire-Gordon, J.D., Segata, N., et al. (2019). Distinct Polysaccharide  
1065 Utilization Profiles of Human Intestinal *Prevotella copri* Isolates. Cell Host Microbe 26, 680-  
1066 690.e5.  
1067 De Filippis, F., Pasolli, E., Tett, A., Tarallo, S., Naccarati, A., De Angelis, M., Neviani, E.,  
1068 Cocolin, L., Gobbetti, M., Segata, N., et al. (2019). Distinct Genetic and Functional Traits of  
1069 Human Intestinal *Prevotella copri* Strains Are Associated with Different Habitual Diets. Cell Host  
1070 Microbe.  
1071 De Filippo, C., Cavalieri, D., Di Paola, M., Ramazzotti, M., Poullet, J.B., Massart, S., Collini, S.,  
1072 Pieraccini, G., and Lionetti, P. (2010). Impact of diet in shaping gut microbiota revealed by a  
1073 comparative study in children from Europe and rural Africa. Proc. Natl. Acad. Sci. U. S. A.  
1074 Fragiadakis, G.K., Smits, S.A., Sonnenburg, E.D., Van Treuren, W., Reid, G., Knight, R.,  
1075 Manjurano, A., Changalucha, J., Dominguez-Bello, M.G., Leach, J., et al. (2019). Links between  
1076 environment, diet, and the hunter-gatherer microbiome. Gut Microbes.

1077 Gálvez, E.J.C., Iljazovic, A., Amend, L., Lesker, T.R., Renault, T., Thiemann, S., Hao, L., Roy,  
1078 U., Gronow, A., Charpentier, E., et al. (2020). Distinct Polysaccharide Utilization Determines  
1079 Interspecies Competition between Intestinal *Prevotella* spp. *Cell Host Microbe*.  
1080 García-Bayona, L., and Comstock, L.E. (2019). Streamlined genetic manipulation of diverse  
1081 bacteroides and parabacteroides isolates from the human gut microbiota. *MBio*.  
1082 Gardner, R.G., Russele, J.B., Wilson, D.B., Wang, G.R., and Shoemaker, N.B. (1996). Use of a  
1083 modified *Bacteroides-Prevotella* shuttle vector to transfer a reconstructed  $\beta$ -1,4-D-  
1084 endoglucanase gene into *Bacteroides uniformis* and *Prevotella ruminicola* B14. *Appl. Environ.*  
1085 *Microbiol.*  
1086 Gay, P., Le Coq, D., Steinmetz, M., Berkelman, T., and Kado, C.I. (1985). Positive selection  
1087 procedure for entrapment of insertion sequence elements in gram-negative bacteria. *J.*  
1088 *Bacteriol.*  
1089 Glenwright, A.J., Pothula, K.R., Bhamidimarri, S.P., Chorev, D.S., Baslé, A., Firbank, S.J.,  
1090 Zheng, H., Robinson, C. V., Winterhalter, M., Kleinekathöfer, U., et al. (2017). Structural basis  
1091 for nutrient acquisition by dominant members of the human gut microbiota. *Nature*.  
1092 Goodman, A.L., Wu, M., and Gordon, J.I. (2011). Identifying microbial fitness determinants by  
1093 insertion sequencing using genome-wide transposon mutant libraries. *Nat. Protoc.*  
1094 Hoang, T.T., Karkhoff-Schweizer, R.R., Kutchma, A.J., and Schweizer, H.P. (1998). A broad-  
1095 host-range F1p-FRT recombination system for site-specific excision of chromosomally-located  
1096 DNA sequences: Application for isolation of unmarked *Pseudomonas aeruginosa* mutants.  
1097 *Gene*.  
1098 Hooper, L. V. (2009). Do symbiotic bacteria subvert host immunity? *Nat. Rev. Microbiol.*  
1099 Johnson, E.L., Heaver, S.L., Walters, W.A., and Ley, R.E. (2017). Microbiome and metabolic  
1100 disease: revisiting the bacterial phylum Bacteroidetes. *J. Mol. Med.*  
1101 Kaoutari, A. El, Armougom, F., Gordon, J.I., Raoult, D., and Henrissat, B. (2013). The  
1102 abundance and variety of carbohydrate-active enzymes in the human gut microbiota. *Nat. Rev.*  
1103 *Microbiol.*  
1104 Katoh, K., and Standley, D.M. (2013). MAFFT multiple sequence alignment software version 7:  
1105 improvements in performance and usability. *Mol. Biol. Evol.* 30, 772–780.  
1106 Kieser, S., Brown, J., Zdobnov, E.M., Trajkovski, M., and McCue, L.A. (2020). ATLAS: A  
1107 Snakemake workflow for assembly, annotation, and genomic binning of metagenome sequence  
1108 data. *BMC Bioinformatics*.  
1109 Koropatkin, N.M., Martens, E.C., Gordon, J.I., and Smith, T.J. (2008). Starch Catabolism by a  
1110 Prominent Human Gut Symbiont Is Directed by the Recognition of Amylose Helices. *Structure*.

1111 Koropatkin, N.M., Cameron, E.A., and Martens, E.C. (2012). How glycan metabolism shapes  
1112 the human gut microbiota. *Nat. Rev. Microbiol.*

1113 Kovatcheva-Datchary, P., Nilsson, A., Akrami, R., Lee, Y.S., De Vadder, F., Arora, T., Hallen,  
1114 A., Martens, E., Björck, I., and Bäckhed, F. (2015). Dietary Fiber-Induced Improvement in  
1115 Glucose Metabolism Is Associated with Increased Abundance of *Prevotella*. *Cell Metab.*

1116 Kovatcheva-Datchary, P., Shoaie, S., Lee, S., Wahlström, A., Nookaew, I., Hallen, A., Perkins,  
1117 R., Nielsen, J., and Bäckhed, F. (2019). Simplified Intestinal Microbiota to Study Microbe-Diet-  
1118 Host Interactions in a Mouse Model. *Cell Rep.*

1119 Ley, R.E. (2016). *Prevotella* in the gut: choose carefully. *Nat. Rev. Gastroenterol. Hepatol.*

1120 Li, Q., Zaim, S.R., Aberasturi, D., Berghout, J., Li, H., Vitali, F., Kenost, C., Zhang, H.H., and  
1121 Lussier, Y.A. (2019). Interpretation of 'Omics dynamics in a single subject using local estimates  
1122 of dispersion between two transcriptomes. *AMIA ... Annu. Symp. Proceedings. AMIA Symp.*

1123 Lim, B., Zimmermann, M., Barry, N.A., and Goodman, A.L. (2017). Engineered Regulatory  
1124 Systems Modulate Gene Expression of Human Commensals in the Gut. *Cell.*

1125 Love, M.I., Huber, W., and Anders, S. (2014). Moderated estimation of fold change and  
1126 dispersion for RNA-seq data with DESeq2. *Genome Biol.*

1127 Lynch, J.B., and Sonnenburg, J.L. (2012). Prioritization of a plant polysaccharide over a mucus  
1128 carbohydrate is enforced by a *Bacteroides* hybrid two-component system. *Mol. Microbiol.*

1129 Maeda, Y., and Takeda, K. (2019). Host–microbiota interactions in rheumatoid arthritis. *Exp.*  
1130 *Mol. Med.*

1131 Martens, E.C., Chiang, H.C., and Gordon, J.I. (2008). Mucosal Glycan Foraging Enhances  
1132 Fitness and Transmission of a Saccharolytic Human Gut Bacterial Symbiont. *Cell Host Microbe.*

1133 Martens, E.C., Koropatkin, N.M., Smith, T.J., and Gordon, J.I. (2009). Complex glycan  
1134 catabolism by the human gut microbiota: The bacteroidetes sus-like paradigm. *J. Biol. Chem.*

1135 Martens, E.C., Lowe, E.C., Chiang, H., Pudlo, N.A., Wu, M., Nathan, P., Abbott, D.W.,  
1136 Henrissat, B., Gilbert, H.J., Bolam, D.N., et al. (2011). Recognition and Degradation of Plant  
1137 Cell Wall Polysaccharides by Two Human Gut Symbionts. *9.*

1138 Miller, C.S., Handley, K.M., Wrighton, K.C., Frischkorn, K.R., Thomas, B.C., and Banfield, J.F.  
1139 (2013). Short-Read Assembly of Full-Length 16S Amplicons Reveals Bacterial Diversity in  
1140 Subsurface Sediments. *PLoS One.*

1141 Mimee, M., Tucker, A.C., Voigt, C.A., and Lu, T.K. (2015). Programming a Human Commensal  
1142 Bacterium, *Bacteroides thetaiotaomicron*, to Sense and Respond to Stimuli in the Murine Gut  
1143 Microbiota. *Cell Syst.*

1144 Nguyen, L.-T., Schmidt, H.A., von Haeseler, A., and Minh, B.Q. (2015). IQ-TREE: a fast and

1145 effective stochastic algorithm for estimating maximum-likelihood phylogenies. *Mol. Biol. Evol.*  
1146 32, 268–274.

1147 Ogata, K., Aminov, R.I., Tajima, K., Nakamura, M., Matsui, H., Nagamine, T., and Benno, Y.  
1148 (1999). Construction of *Prevotella ruminicola*-*Escherichia coli* shuttle vector pRAM45 and  
1149 transformation of *P. ruminicola* strains by electroporation. *J. Biosci. Bioeng.*

1150 Patnode, M.L., Beller, Z.W., Han, N.D., Cheng, J., Peters, S.L., Terrapon, N., Henrissat, B., Le  
1151 Gall, S., Saulnier, L., Hayashi, D.K., et al. (2019). Interspecies Competition Impacts Targeted  
1152 Manipulation of Human Gut Bacteria by Fiber-Derived Glycans. *Cell*.

1153 Pedersen, H.K., Gudmundsdottir, V., Nielsen, H.B., Hyotylainen, T., Nielsen, T., Jensen, B.A.H.,  
1154 Forslund, K., Hildebrand, F., Prifti, E., Falony, G., et al. (2016). Human gut microbes impact host  
1155 serum metabolome and insulin sensitivity. *Nature*.

1156 Peters, J.M., Colavin, A., Shi, H., Czarny, T.L., Larson, M.H., Wong, S., Hawkins, J.S., Lu,  
1157 C.H.S., Koo, B.M., Marta, E., et al. (2016). A comprehensive, CRISPR-based functional analysis  
1158 of essential genes in bacteria. *Cell*.

1159 Porter, N.T., and Martens, E.C. (2017). The Critical Roles of Polysaccharides in Gut Microbial  
1160 Ecology and Physiology. *Annu. Rev. Microbiol.*

1161 Recorbet, G., Robert, C., Givaudan, A., Kudla, B., Normand, P., and Faurie, G. (1993).  
1162 Conditional suicide system of *Escherichia coli* released into soil that uses the *Bacillus subtilis*  
1163 *sacB* gene. *Appl. Environ. Microbiol.*

1164 Reyrat, J.M., Pelicic, V., Gicquel, B., and Rappuoli, R. (1998). Counterselectable markers:  
1165 Untapped tools for bacterial genetics and pathogenesis. *Infect. Immun.*

1166 Ruengsomwong, S., La-Ongkham, O., Jiang, J., Wannissorn, B., Nakayama, J., and  
1167 Nitisinprasert, S. (2016). Microbial community of healthy thai vegetarians and non-vegetarians,  
1168 their core gut microbiota, and pathogen risk. *J. Microbiol. Biotechnol.*

1169 Saitou, N., and Nei, M. (1987). The neighbor-joining method: a new method for reconstructing  
1170 phylogenetic trees. *Mol. Biol. Evol.*

1171 Salyers, A.A., Shoemaker, N., Cooper, A., D'Elia, J., and Shipman, J.A. (1999). 8 Genetic  
1172 Methods for *Bacteroides* Species. *Methods Microbiol.*

1173 Scher, J.U., Sczesnak, A., Longman, R.S., Segata, N., Ubeda, C., Bielski, C., Rostron, T.,  
1174 Cerundolo, V., Pamer, E.G., Abramson, S.B., et al. (2013). Expansion of intestinal *Prevotella*  
1175 *copri* correlates with enhanced susceptibility to arthritis. *Elife*.

1176 Schwalm, N.D., Townsend, G.E., and Groisman, E.A. (2016). Multiple signals govern utilization  
1177 of a polysaccharide in the gut bacterium *bacteroides thetaiotaomicron*. *MBio*.

1178 Shipman, J.A., Berleman, J.E., and Salyers, A.A. (2000). Characterization of four outer

1179 membrane proteins involved in binding starch to the cell surface of *Bacteroides*  
1180 *thetaiotaomicron*. *J. Bacteriol.*

1181 Shoemaker, N.B., Anderson, K.L., Smithson, S.L., Wang, G.R., and Salyers, A.A. (1991).  
1182 Conjugal transfer of a shuttle vector from the human colonic anaerobe *Bacteroides uniformis* to  
1183 the ruminal anaerobe *Prevotella (Bacteroides) ruminicola* B14. *Appl. Environ. Microbiol.*

1184 Sonnenburg, E.D., Sonnenburg, J.L., Manchester, J.K., Hansen, E.E., Chiang, H.C., and  
1185 Gordon, J.I. (2006). A hybrid two-component system protein of a prominent human gut symbiont  
1186 couples glycan sensing in vivo to carbohydrate metabolism. *Proc. Natl. Acad. Sci. U. S. A.*

1187 Sonnenburg, E.D., Zheng, H., Joglekar, P., Higginbottom, S.K., Firbank, S.J., Bolam, D.N., and  
1188 Sonnenburg, J.L. (2010). Specificity of polysaccharide use in intestinal *bacteroides* species  
1189 determines diet-induced microbiota alterations. *Cell.*

1190 Stamatakis, A. (2014). RAxML version 8: a tool for phylogenetic analysis and post-analysis of  
1191 large phylogenies. *Bioinformatics* 30, 1312–1313.

1192 Stewart, R.D., Auffret, M.D., Roehle, R., and Watson, M. (2018). Open prediction of  
1193 polysaccharide utilisation loci (PUL) in 5414 public *Bacteroidetes* genomes using PULpy.  
1194 *BioRxiv.*

1195 Terrapon, N., Lombard, V., Gilbert, H.J., and Henrissat, B. (2015). Automatic prediction of  
1196 polysaccharide utilization loci in *Bacteroidetes* species. *Bioinformatics.*

1197 Tett, A., Huang, K.D., Asnicar, F., Fehlner-Peach, H., Pasolli, E., Karcher, N., Armanini, F.,  
1198 Manghi, P., Bonham, K., Zolfo, M., et al. (2019). The *Prevotella copri* Complex Comprises Four  
1199 Distinct Clades Underrepresented in Westernized Populations. *Cell Host Microbe.*

1200 De Vadder, F., Kovatcheva-Datchary, P., Zitoun, C., Duchamp, A., Bäckhed, F., and Mithieux,  
1201 G. (2016). Microbiota-Produced Succinate Improves Glucose Homeostasis via Intestinal  
1202 Gluconeogenesis. *Cell Metab.*

1203 Wang, J., Shoemaker, N.B., Wang, G.R., and Salyers, A.A. (2000). Characterization of a  
1204 *Bacteroides* mobilizable transposon, NBU2, which carries a functional lincomycin resistance  
1205 gene. *J. Bacteriol.*

1206 Wells, P.M., Adebayo, A.S., Bowyer, R.C.E., Freidin, M.B., Finckh, A., Strowig, T., Lesker, T.R.,  
1207 Alpizar-Rodriguez, D., Gilbert, B., Kirkham, B., et al. (2020). Associations between gut  
1208 microbiota and genetic risk for rheumatoid arthritis in the absence of disease: a cross-sectional  
1209 study. *Lancet Rheumatol.*

1210 Wexler, A.G., and Goodman, A.L. (2017). An insider's perspective: *Bacteroides* as a window  
1211 into the microbiome. *Nat. Microbiol.*

1212 Wu, G.D., Chen, J., Hoffmann, C., Bittinger, K., Chen, Y.Y., Keilbaugh, S.A., Bewtra, M.,

1213 Knights, D., Walters, W.A., Knight, R., et al. (2011). Linking long-term dietary patterns with gut  
1214 microbial enterotypes. *Science* (80-. ).

1215 Xu, J., Bjursell, M.K., Himrod, J., Deng, S., Carmichael, L.K., Chiang, H.C., Hooper, L. V., and  
1216 Gordon, J.I. (2003). A genomic view of the human-*Bacteroides thetaiotaomicron* symbiosis.  
1217 *Science* (80-. ).

1218 Zhang, H., Yohe, T., Huang, L., Entwistle, S., Wu, P., Yang, Z., Busk, P.K., Xu, Y., and Yin, Y.  
1219 (2018). dbCAN2: a meta server for automated carbohydrate-active enzyme annotation. *Nucleic*  
1220 *Acids Res.* 46, 95–101.

1221
